# Supplementary material for: Proteomics reveals a therapeutic vulnerability via the combined blockade of APE1 and autophagy in lung cancer A549 cells
Source: Springer Nature journal article supplement (doi:10.1186/s12885-020-07111-w), 2020-07-08

# Supplementary Figure 1

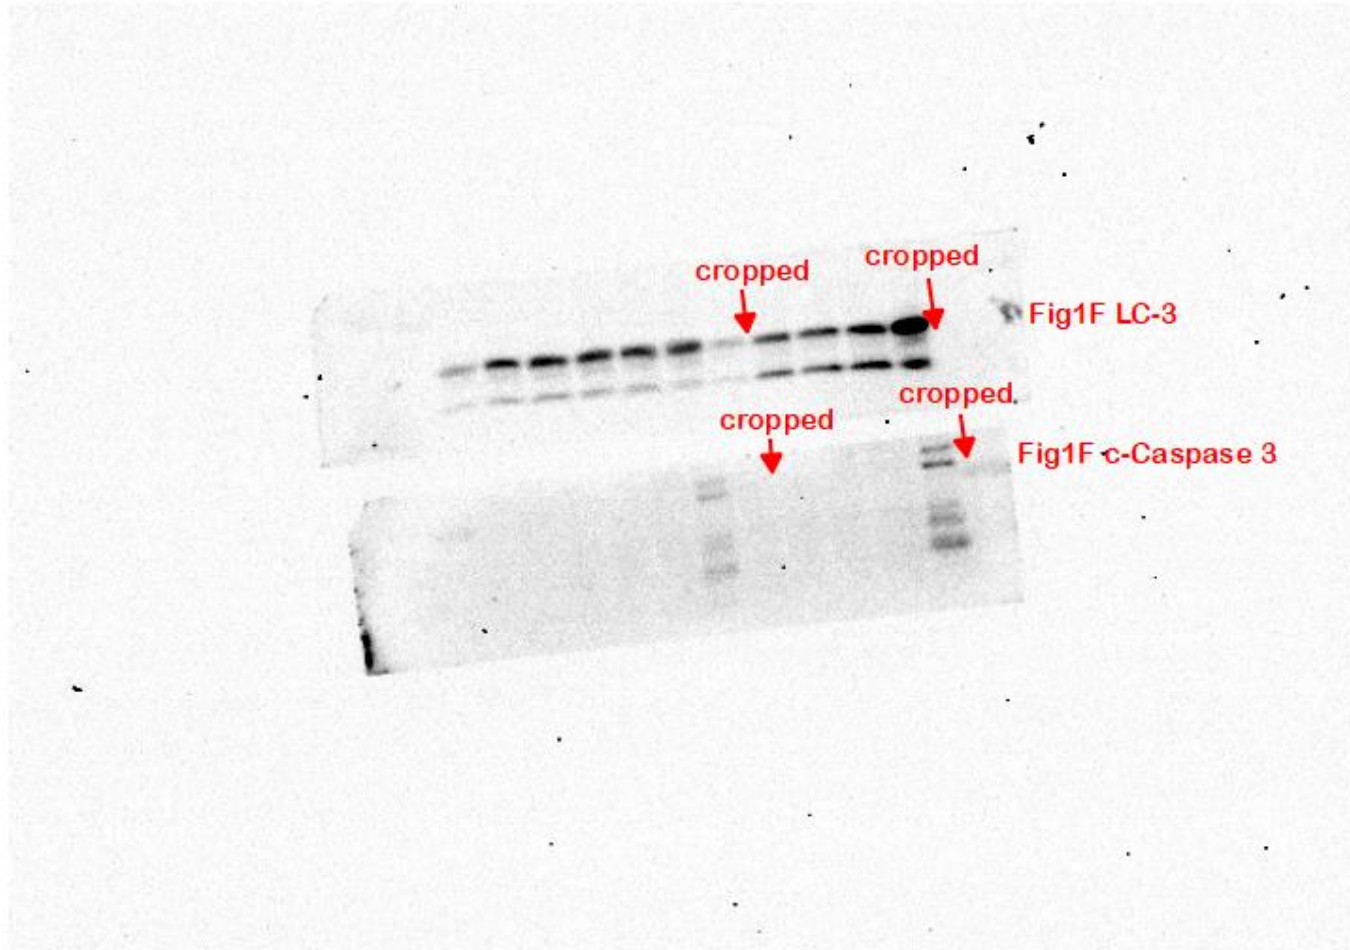

## Supplementary Figure 2

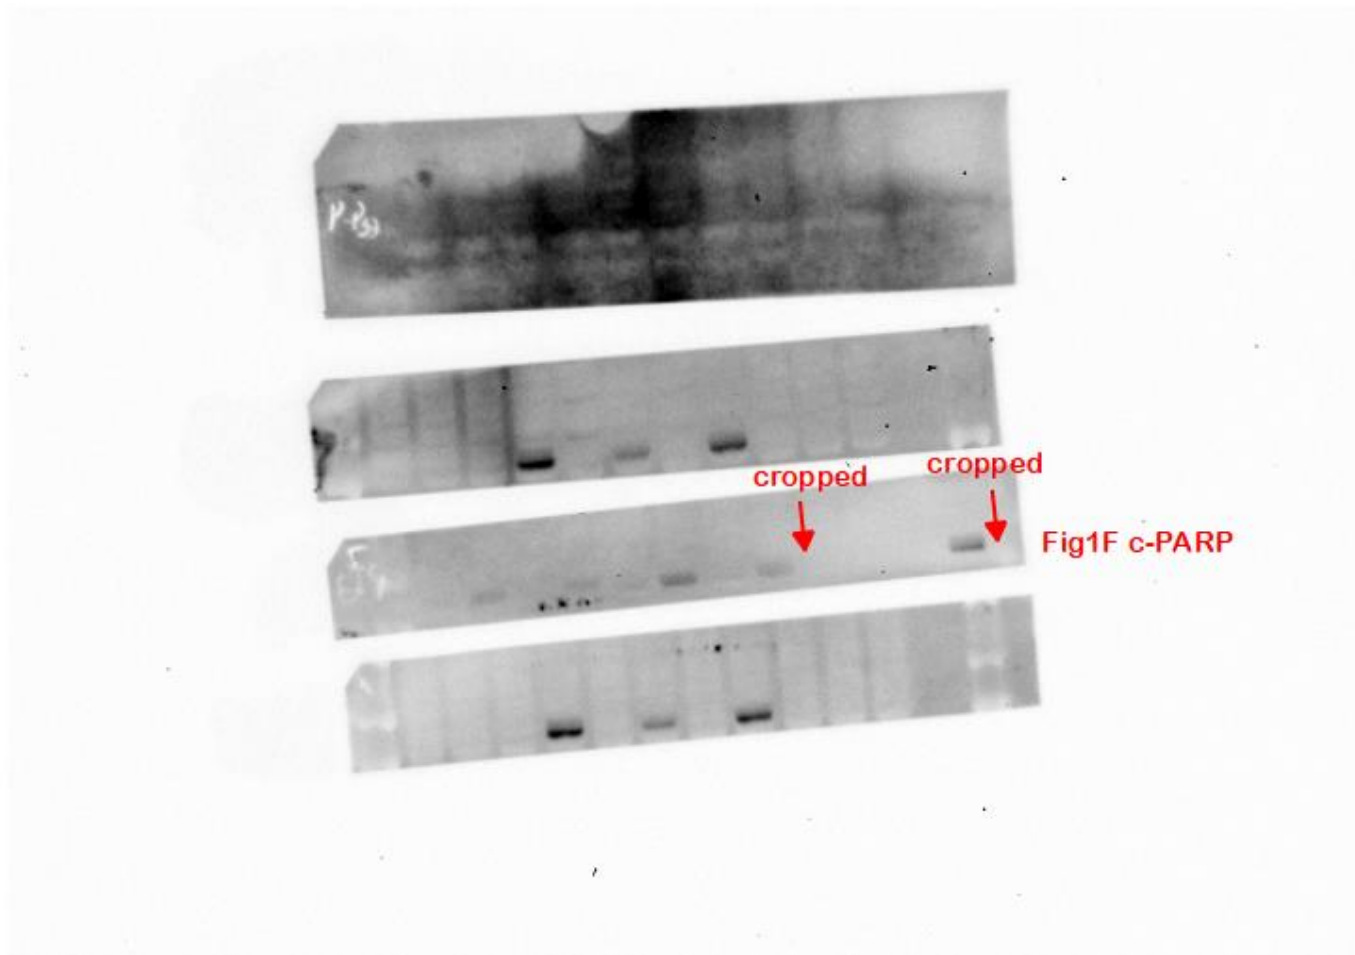

## Supplementary Figure 3

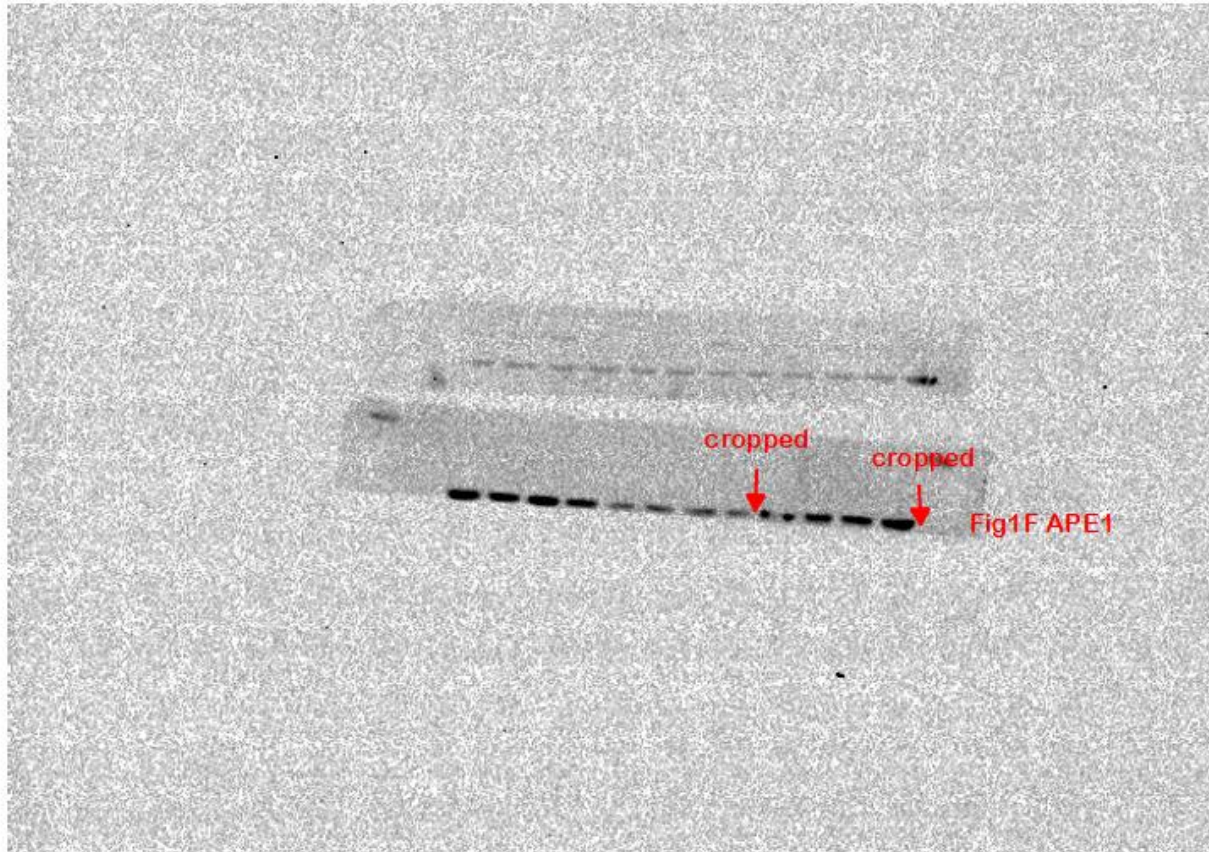

# Supplementary Figure 4

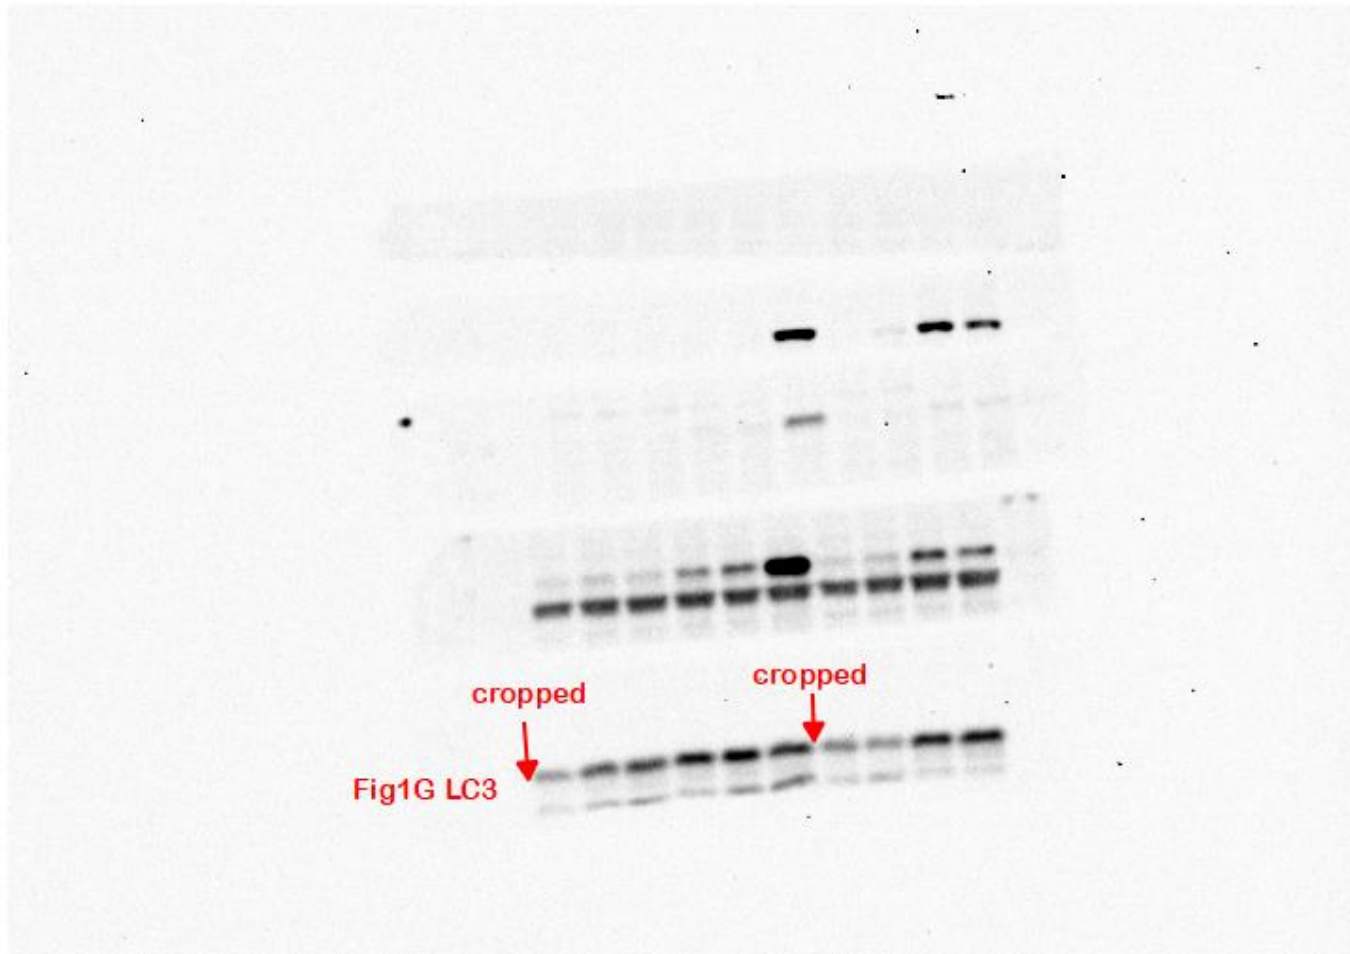

# Supplementary Figure 5

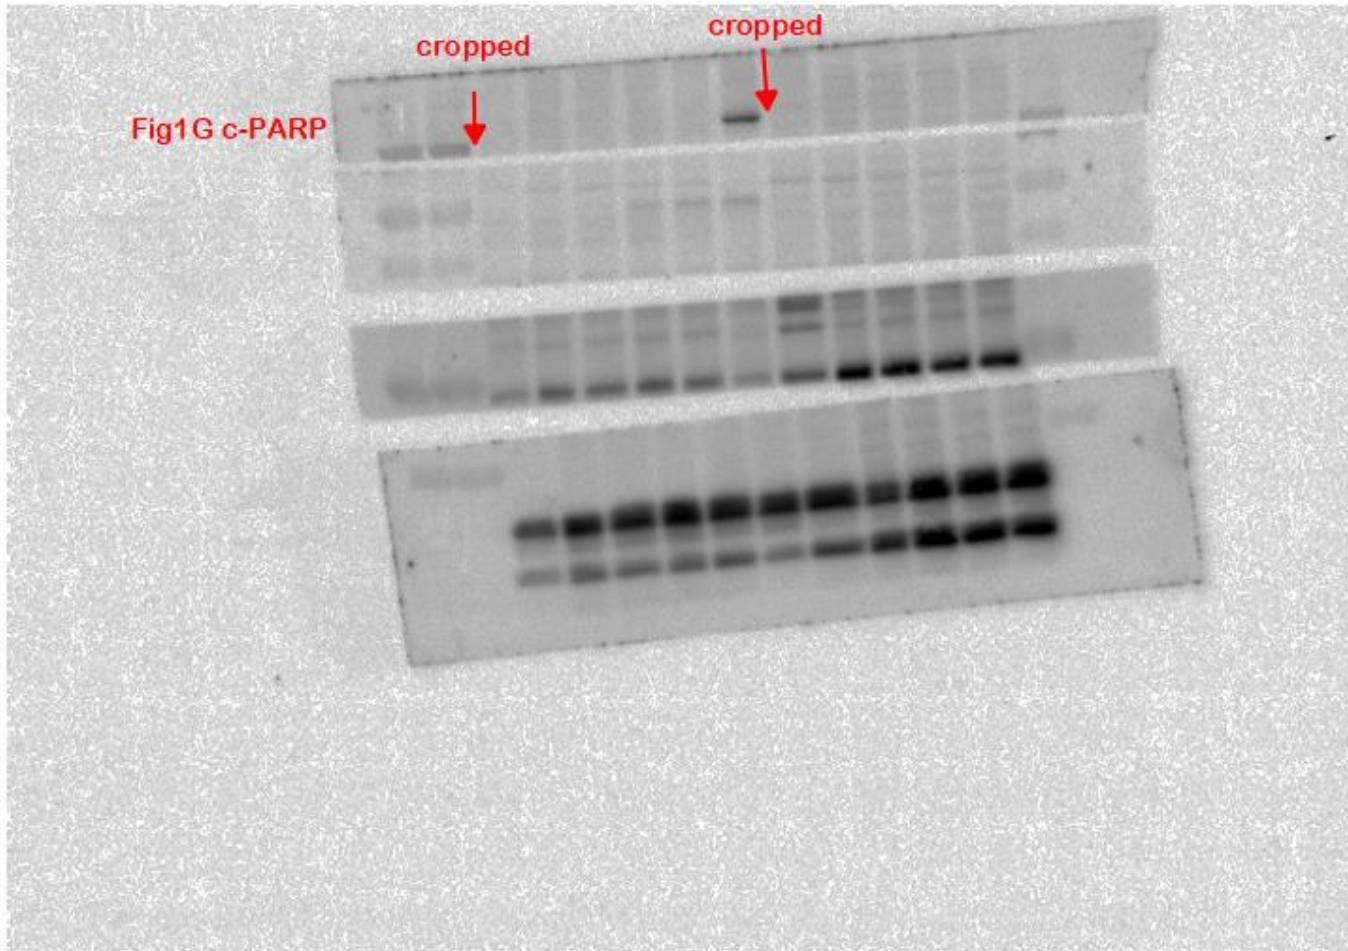

# Supplementary Figure 6

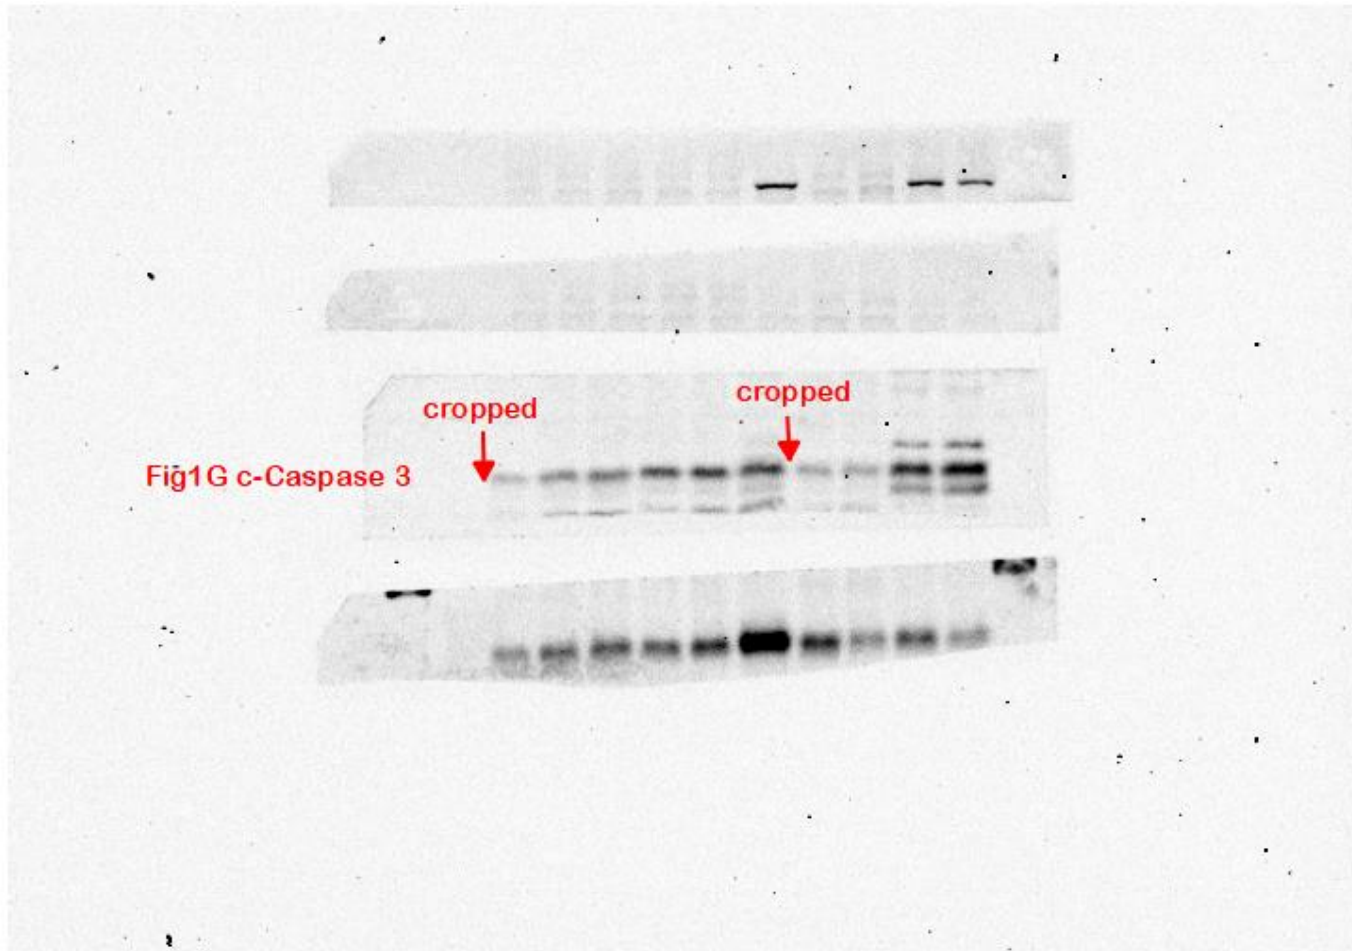

# Supplementary Figure 7

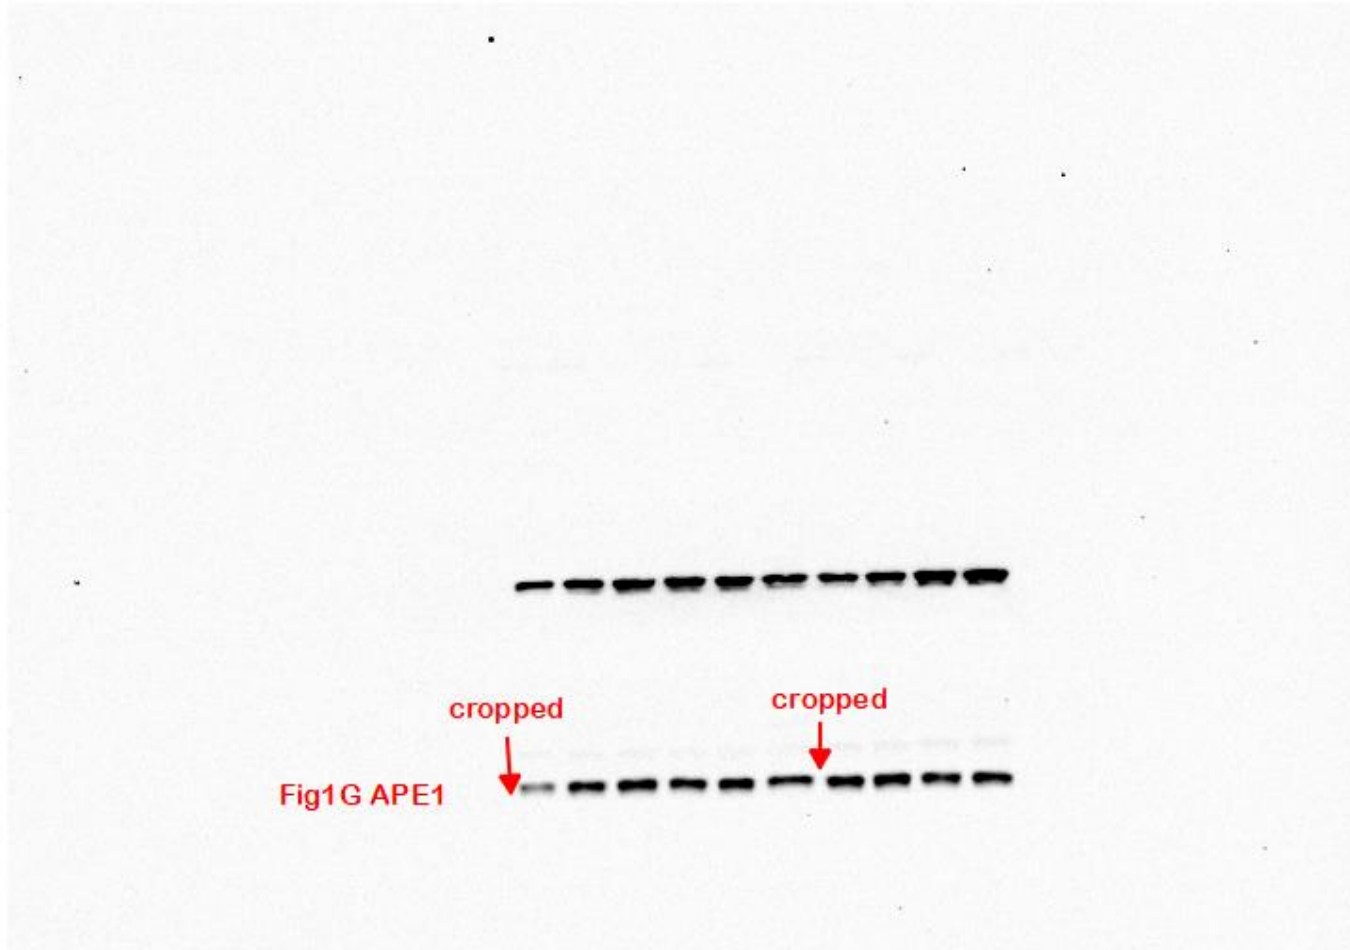

# Supplementary Figure 8

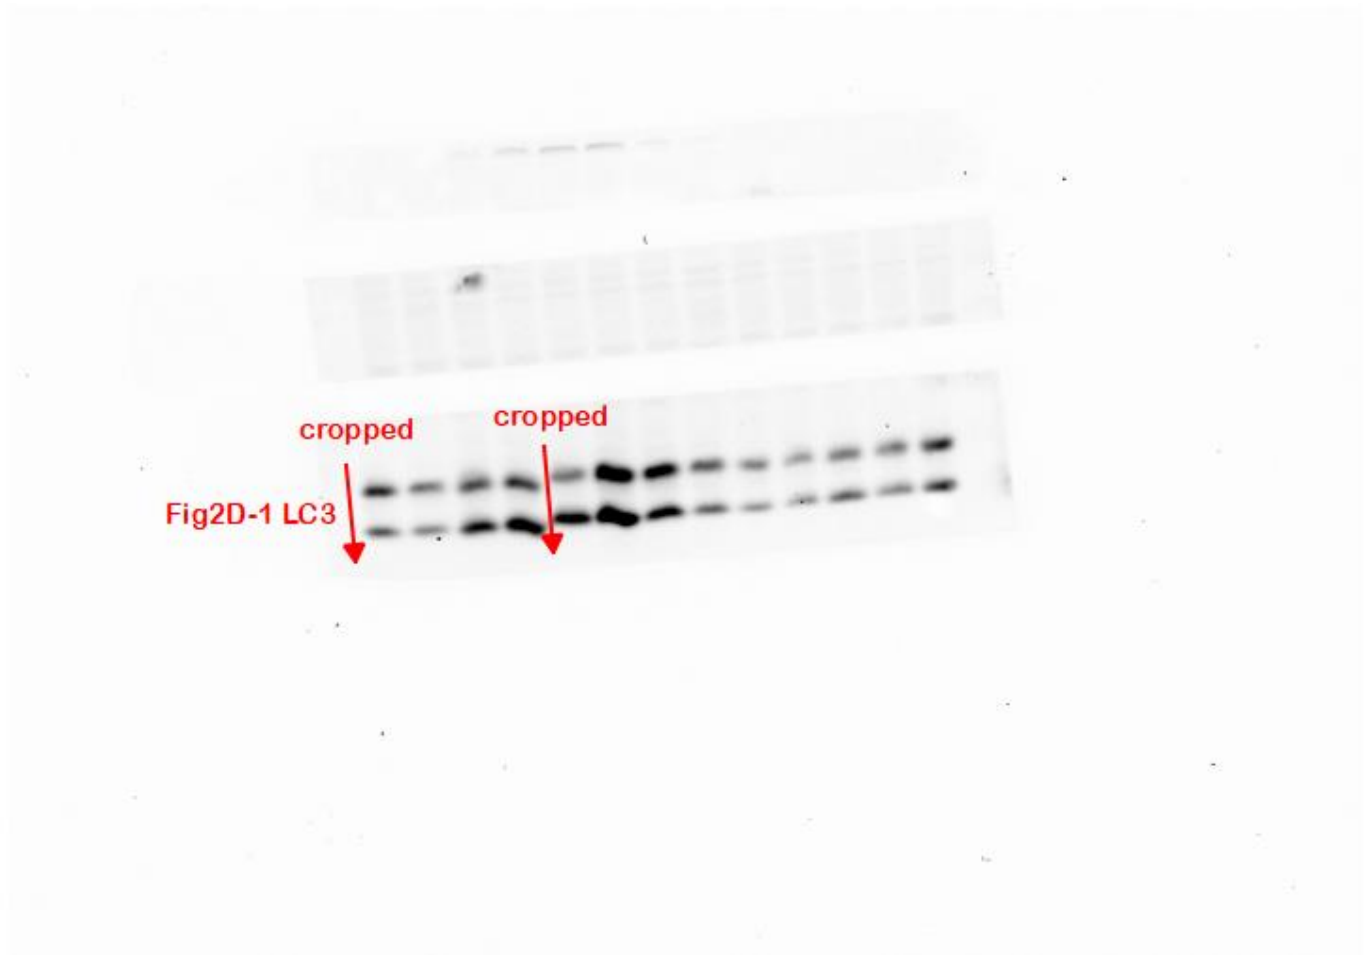



# Supplementary Figure 9

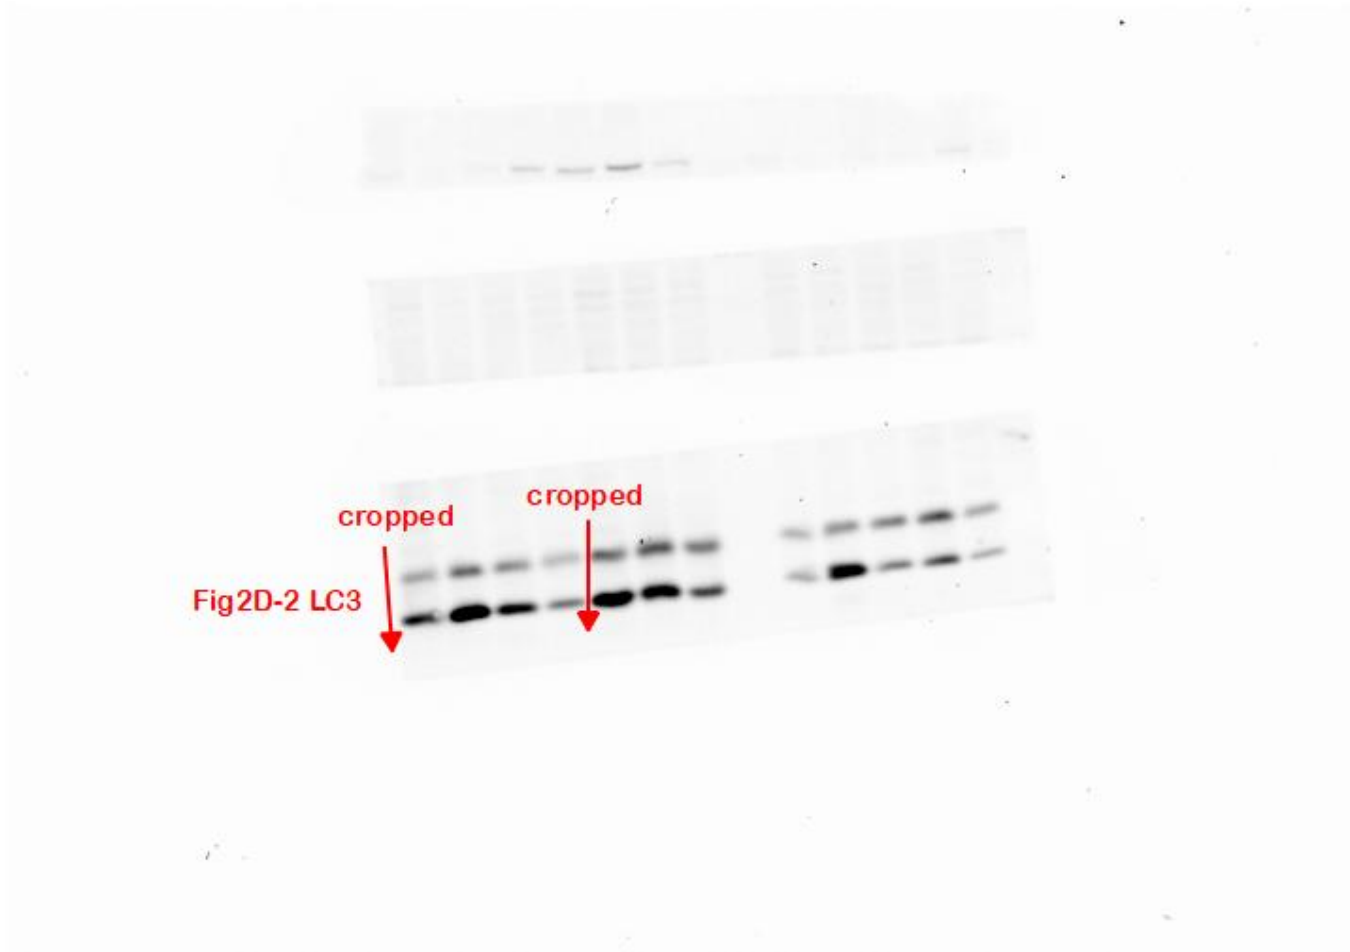

Supplementary Figure 10

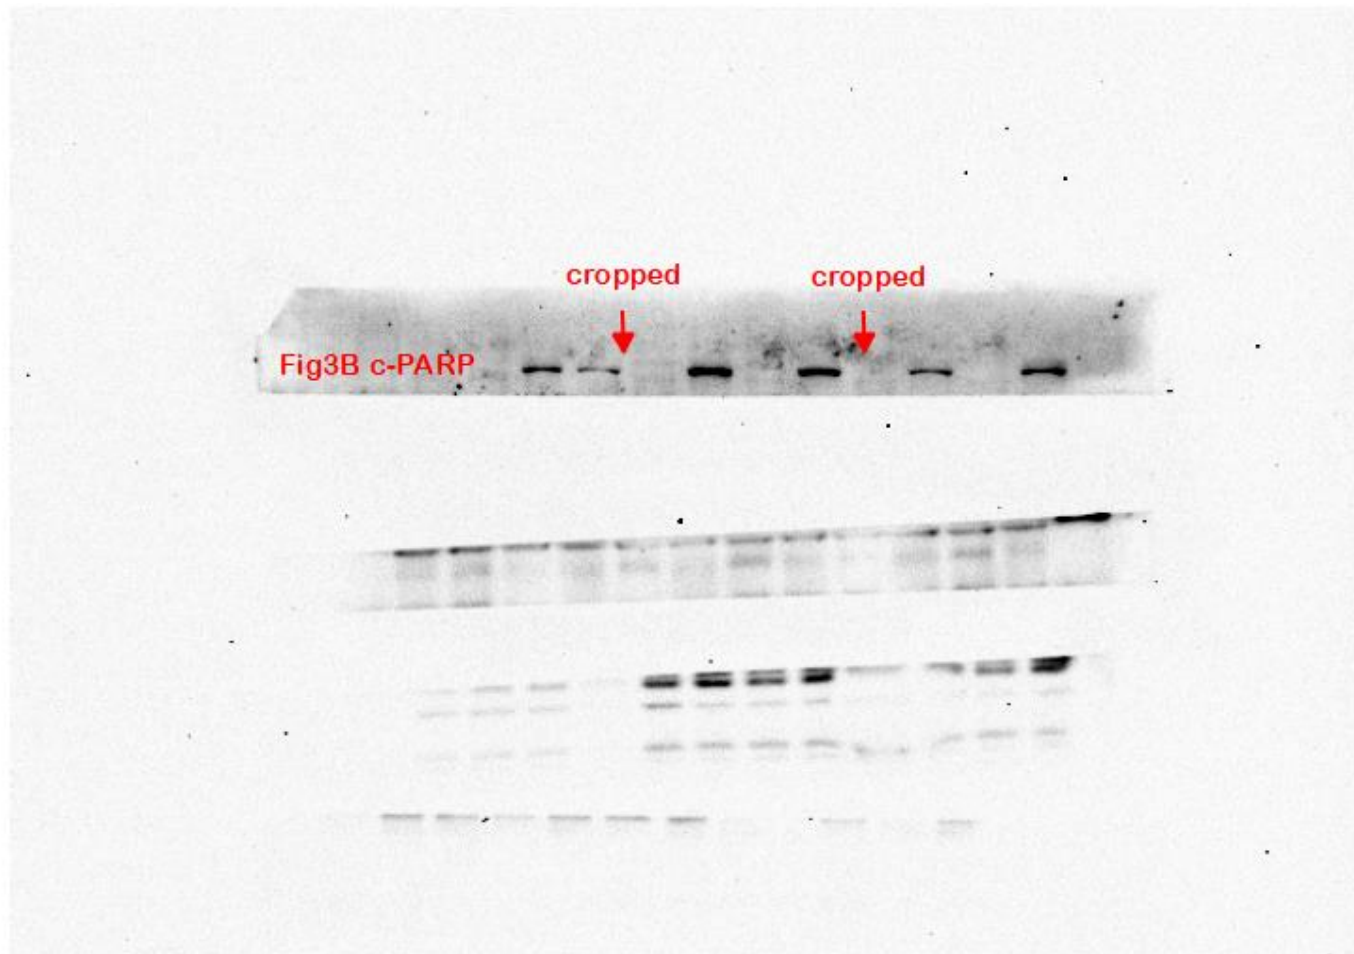

# Supplementary Figure 11

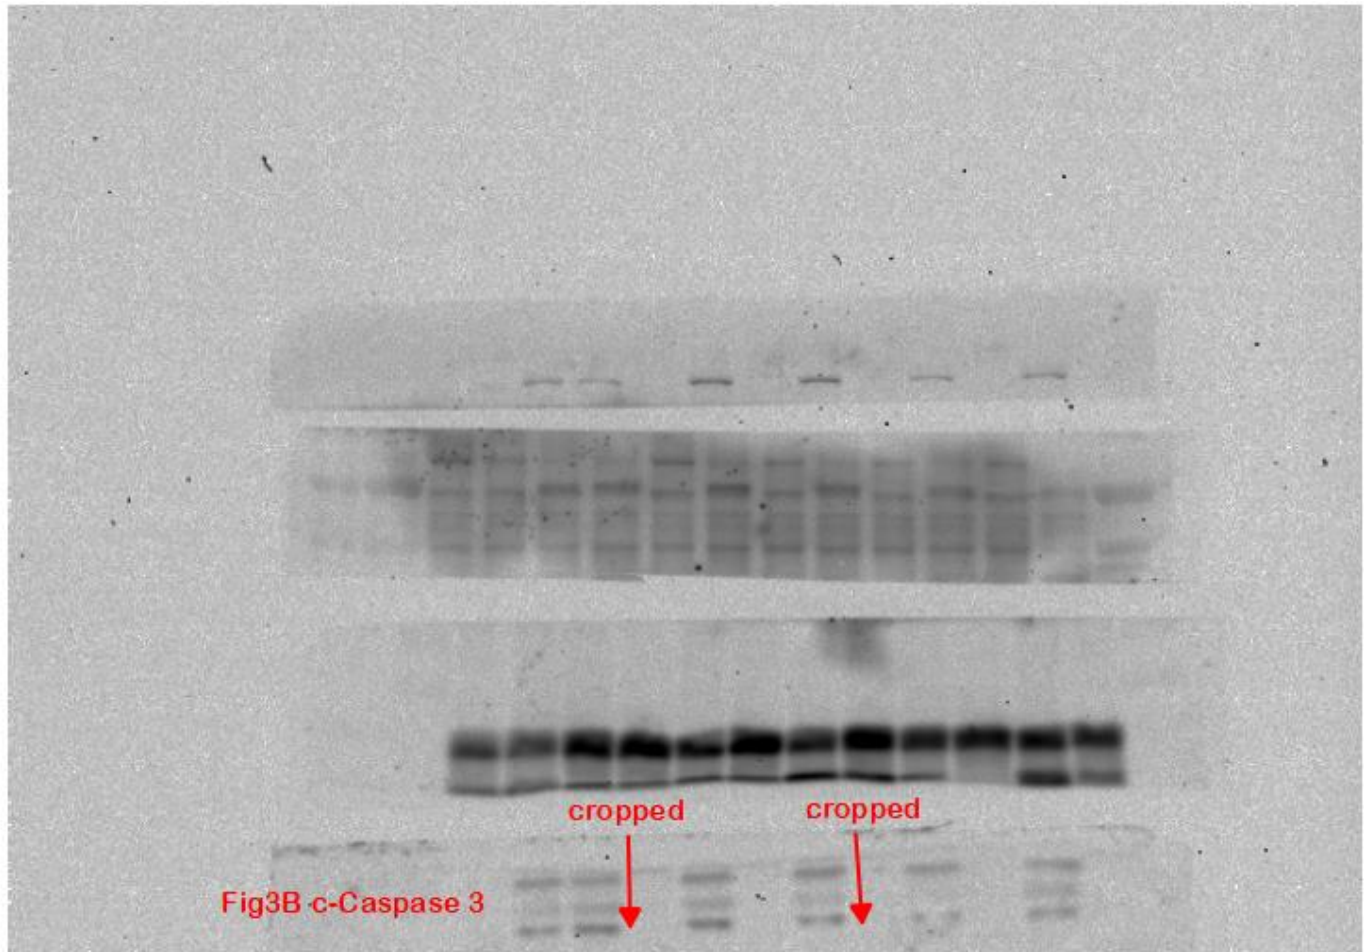

## Supplementary Figure 12

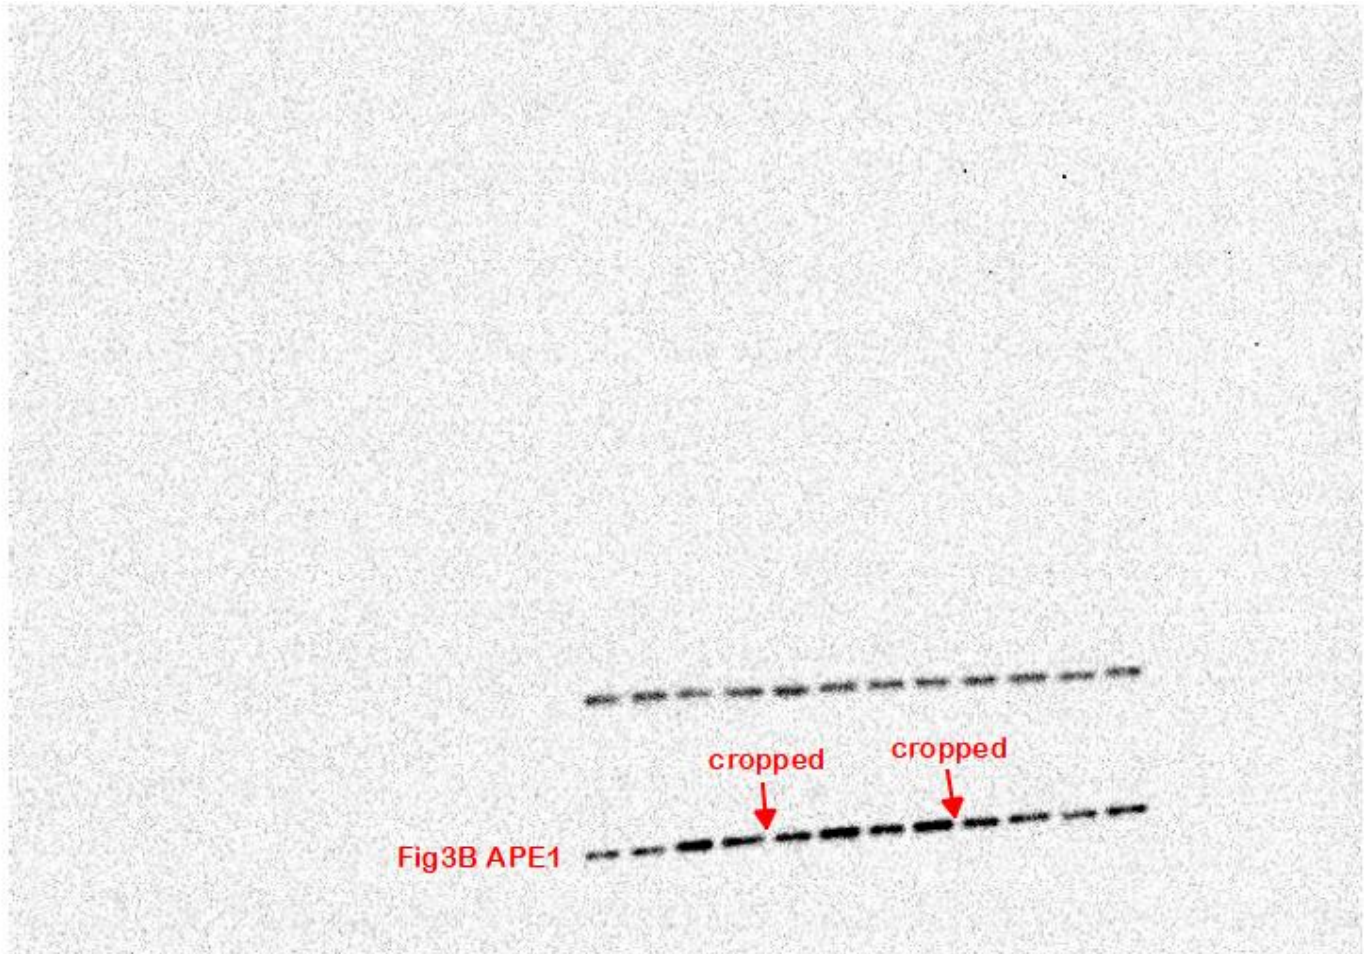

# Supplementary Figure 13

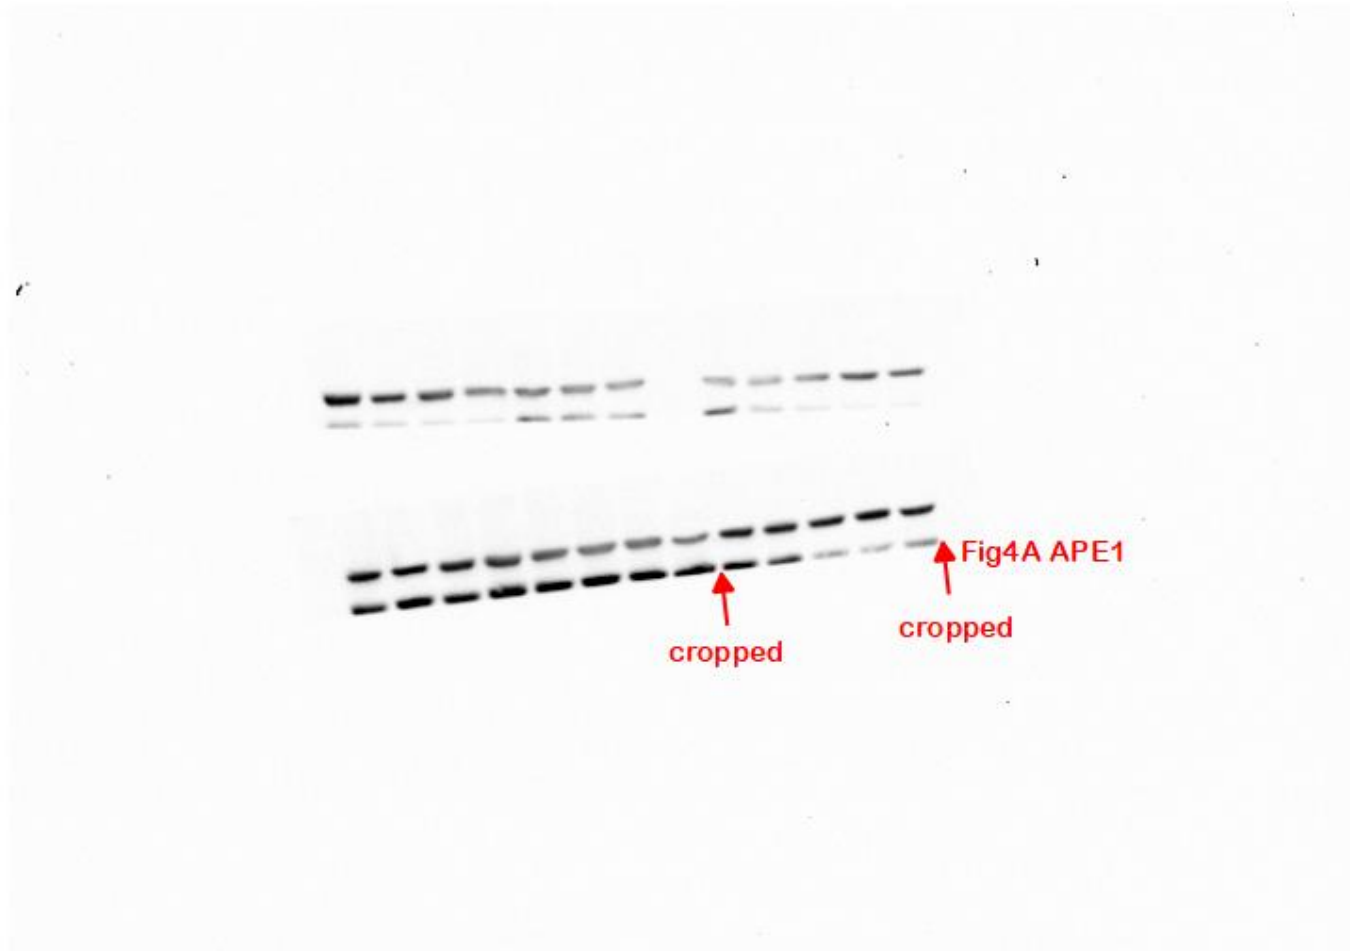

# Supplementary Figure 14

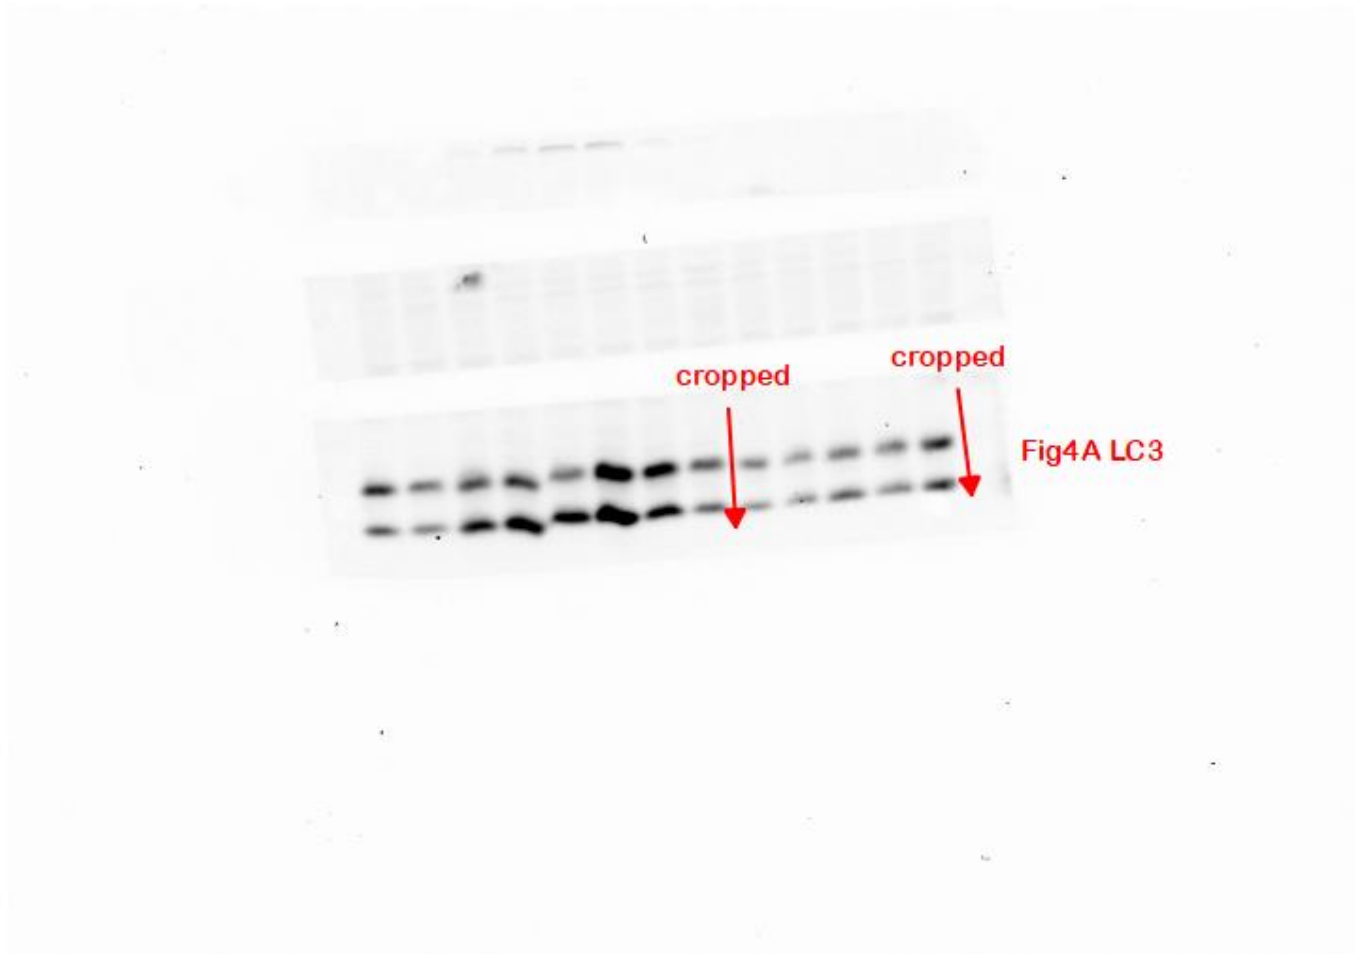

## Supplementary Figure 15

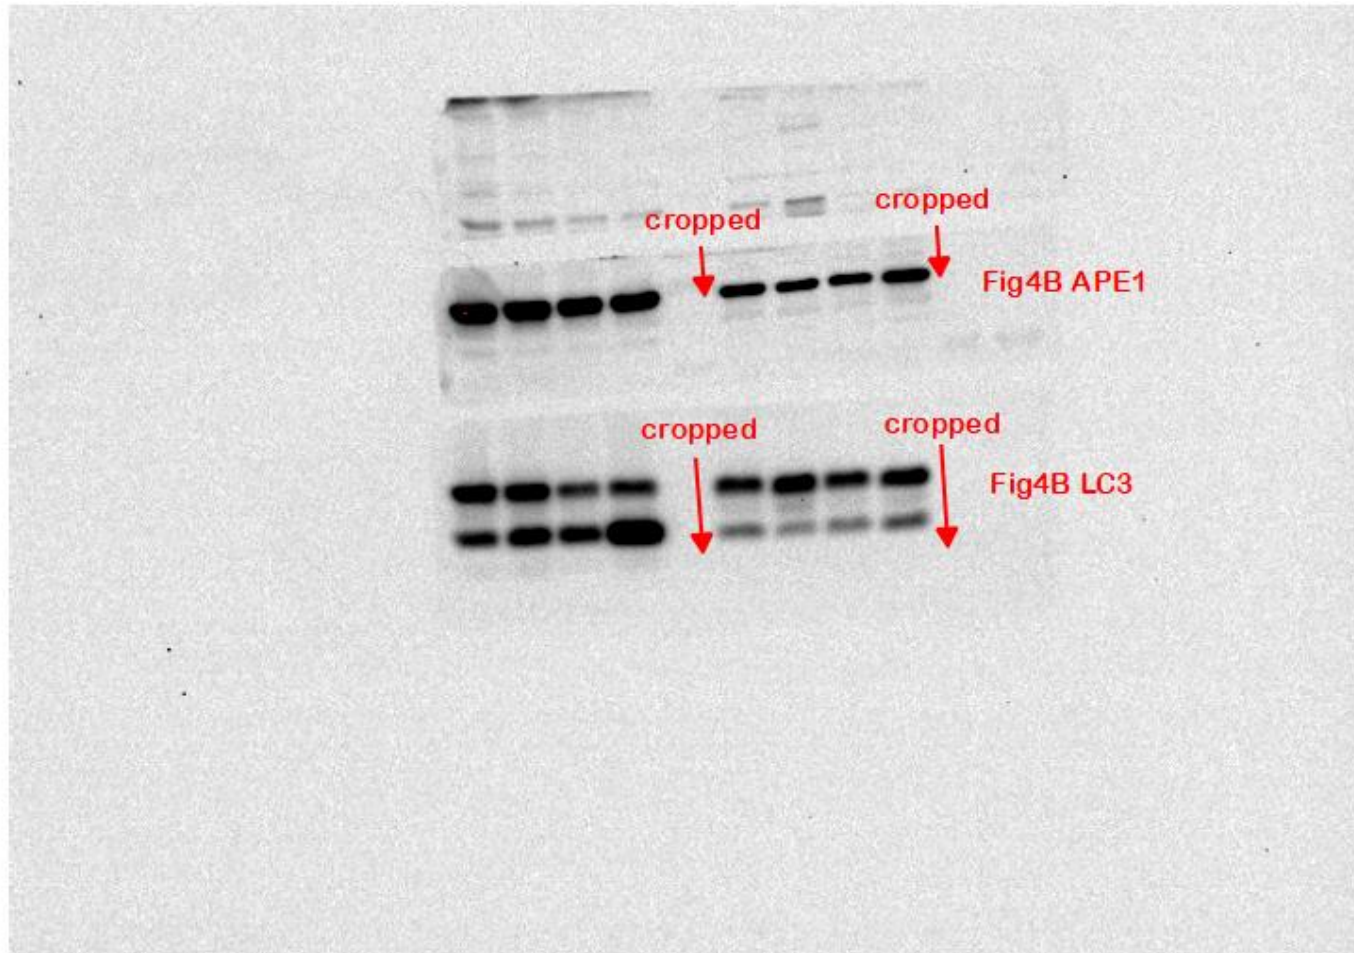

# Supplementary Figure 16

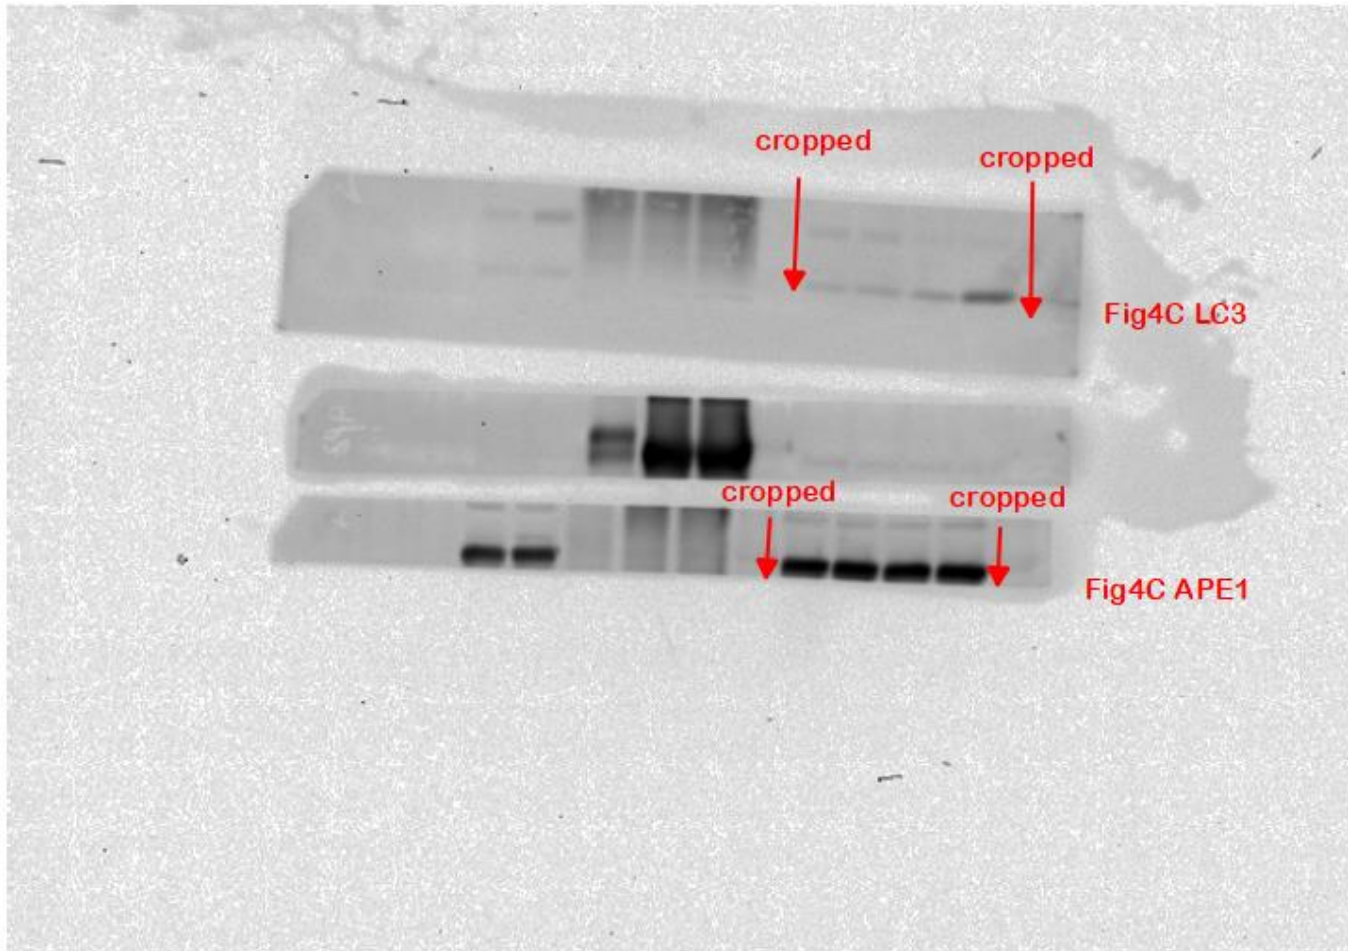



# Supplementary Figure 17

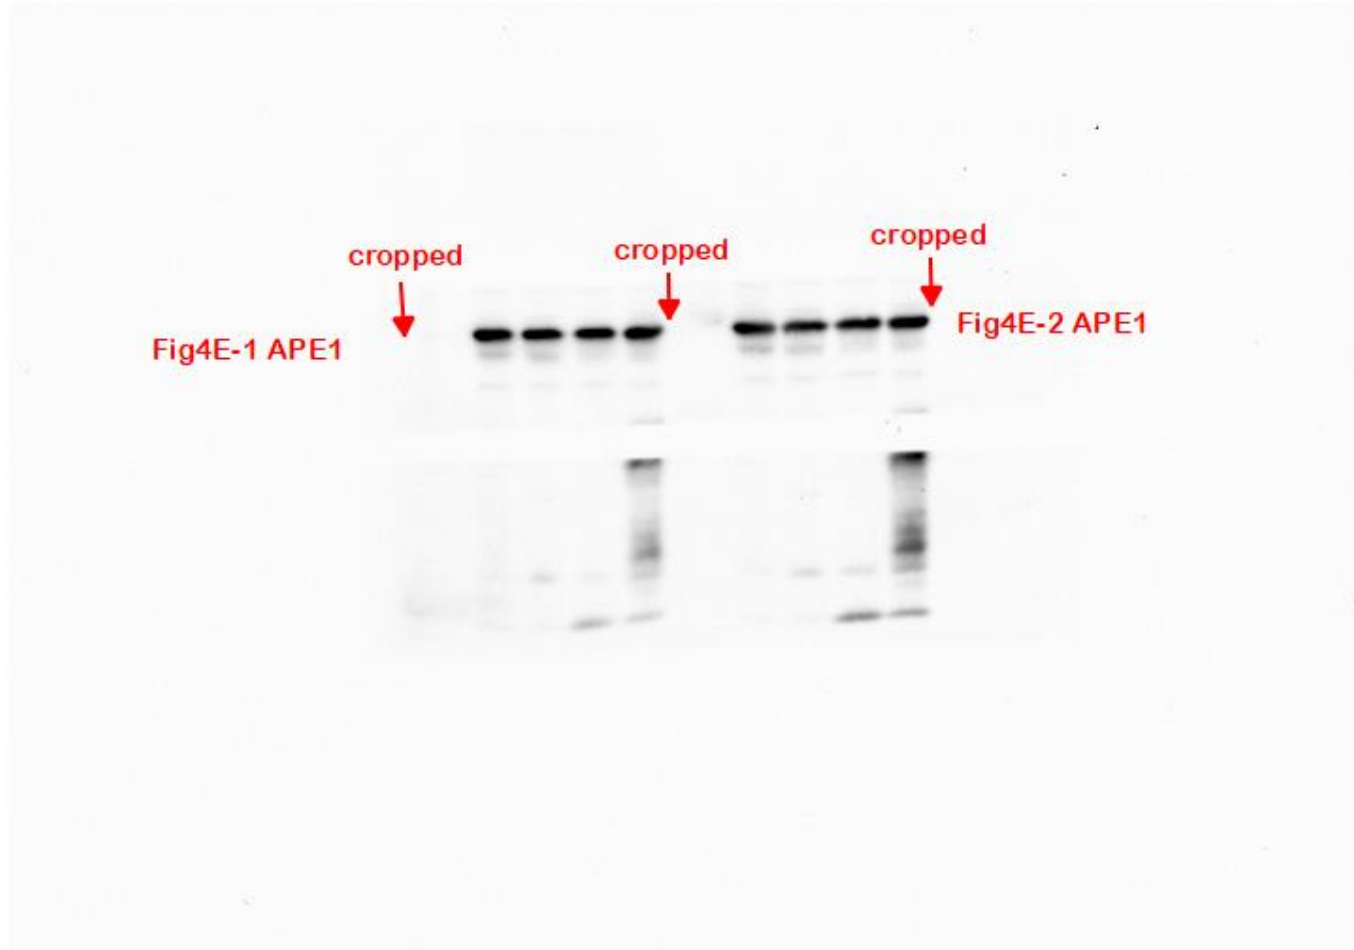

# Supplementary Figure 18

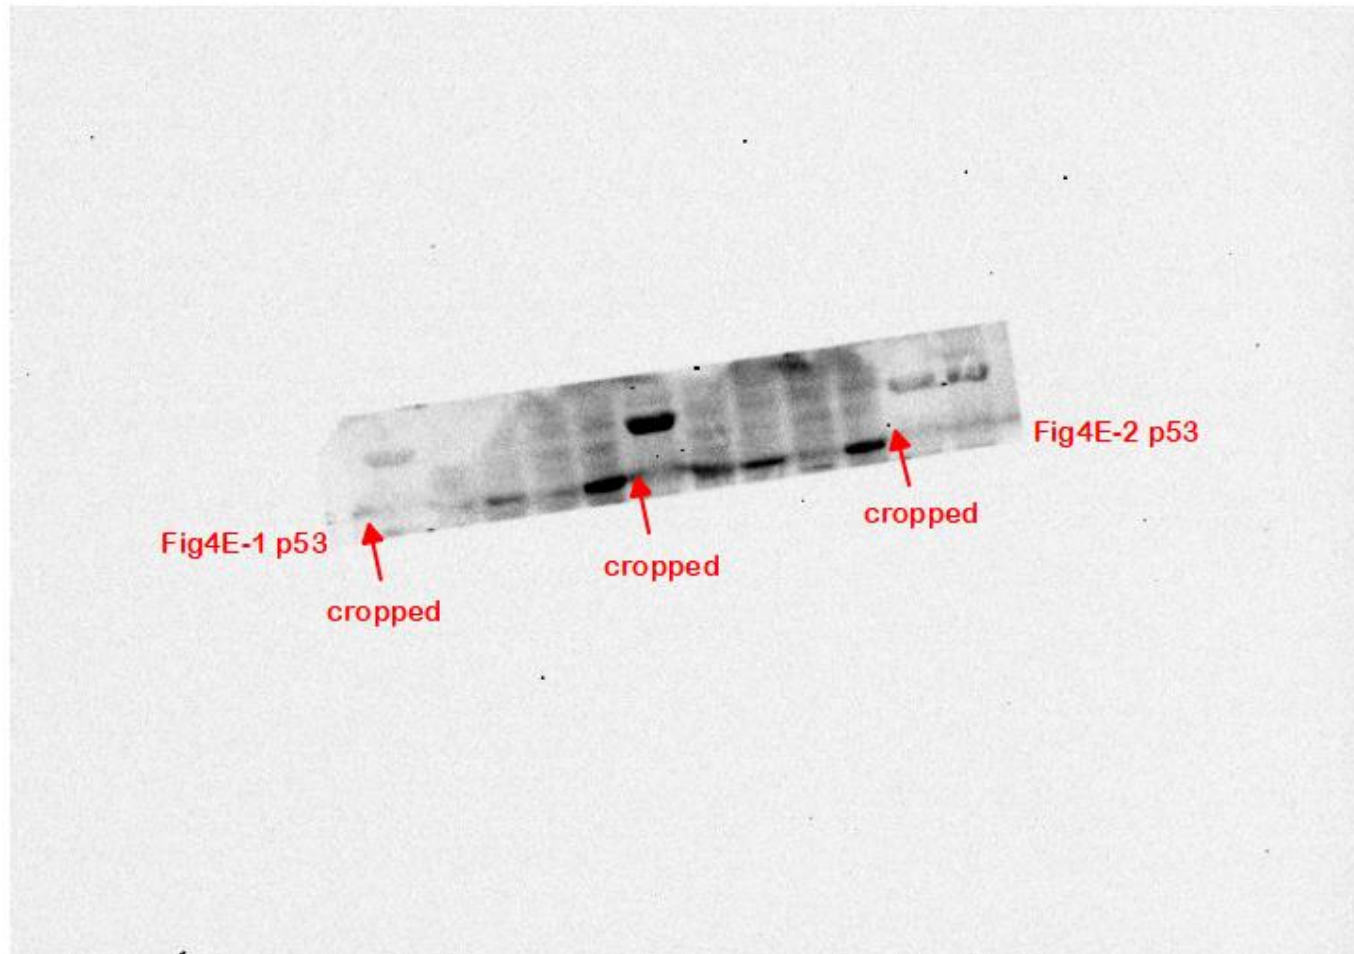

# Supplementary Figure 19

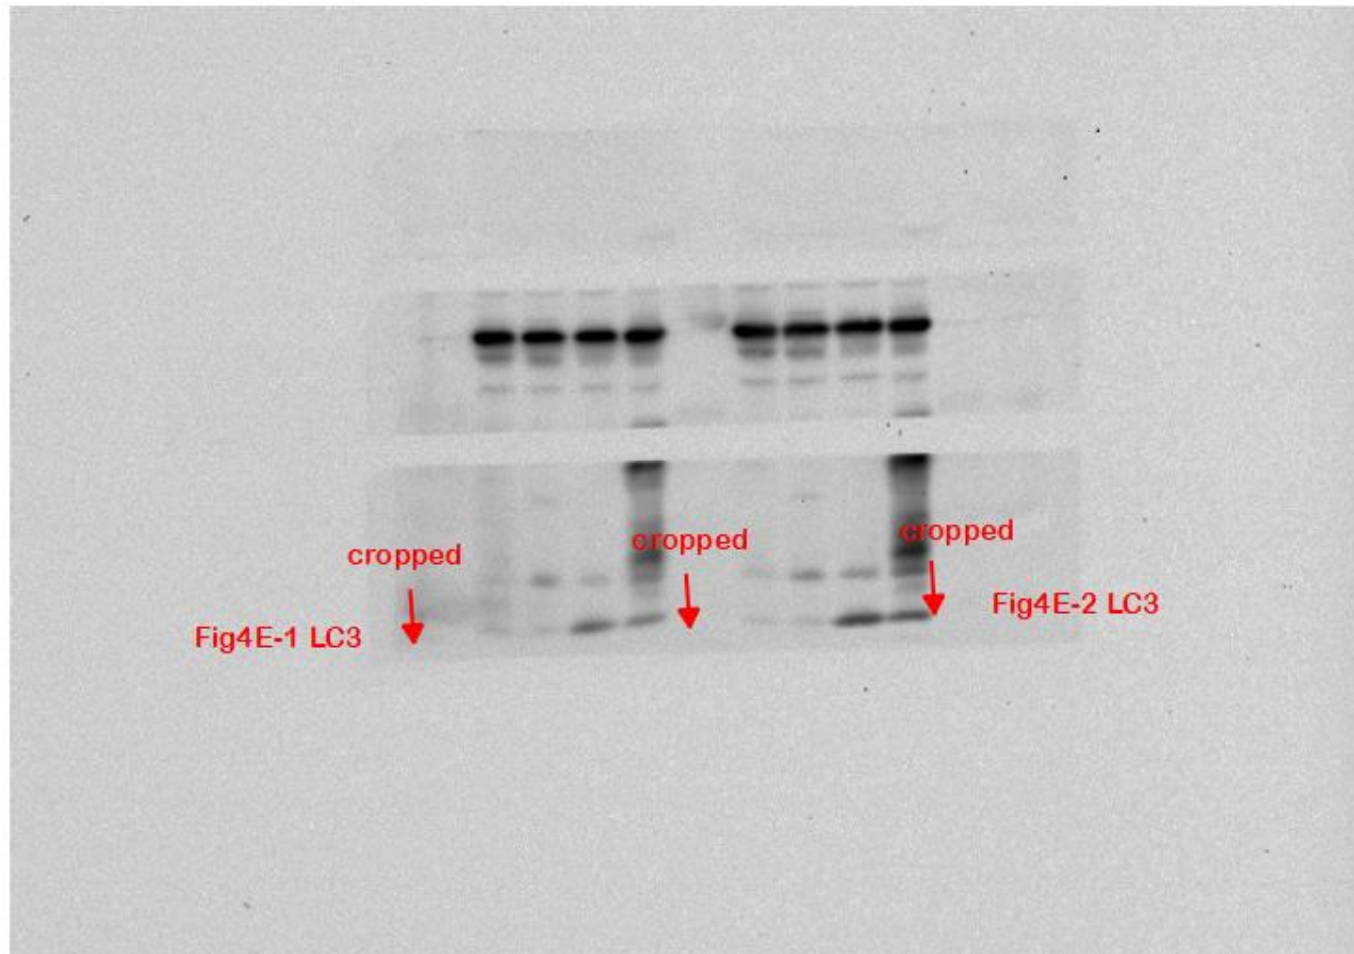

# Supplementary Figure 20

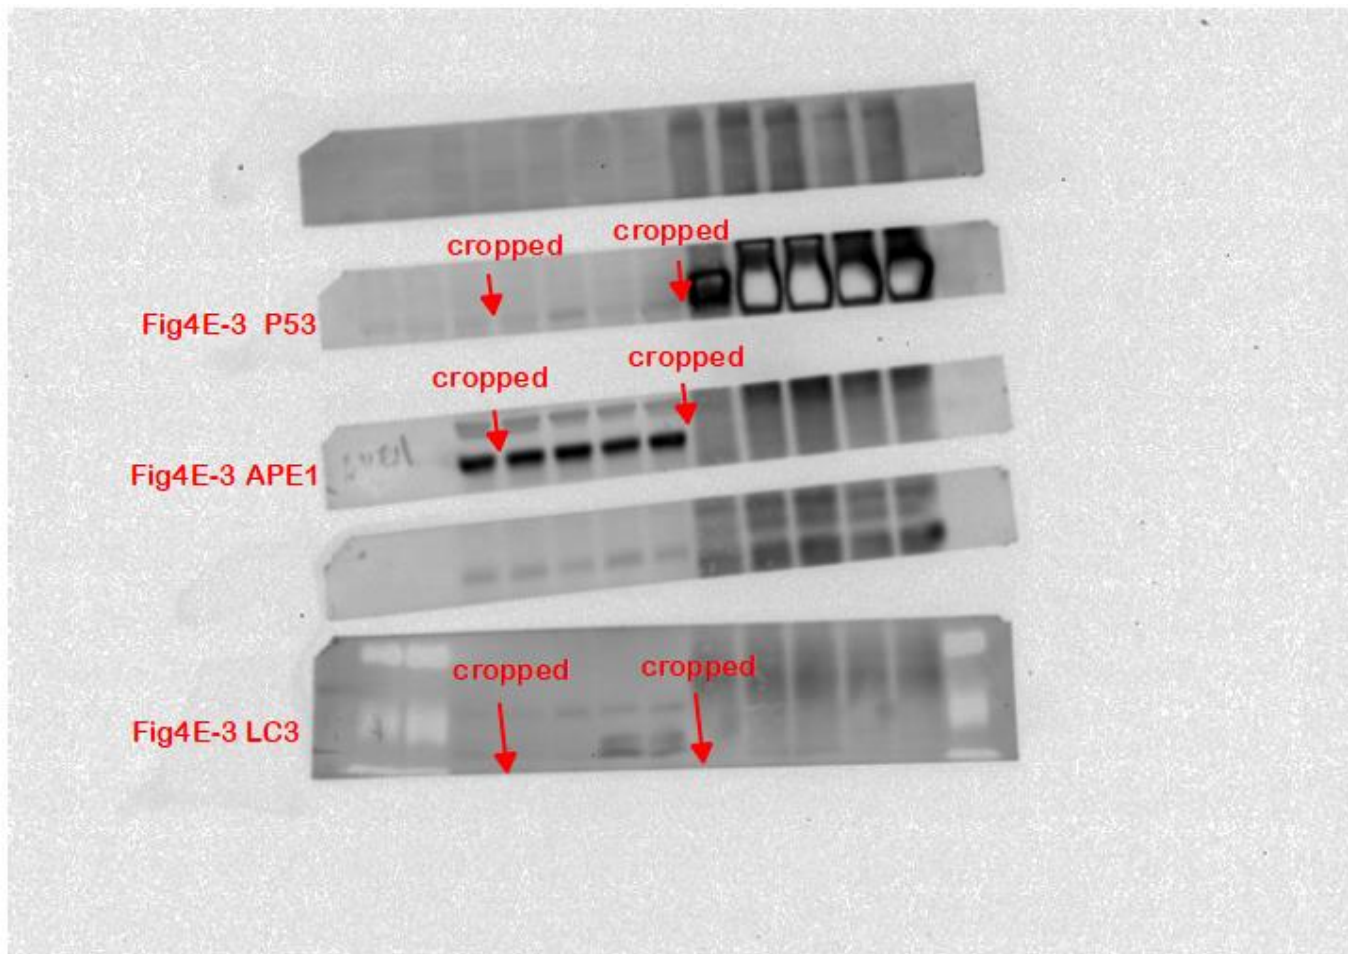

## Supplementary Figure 21

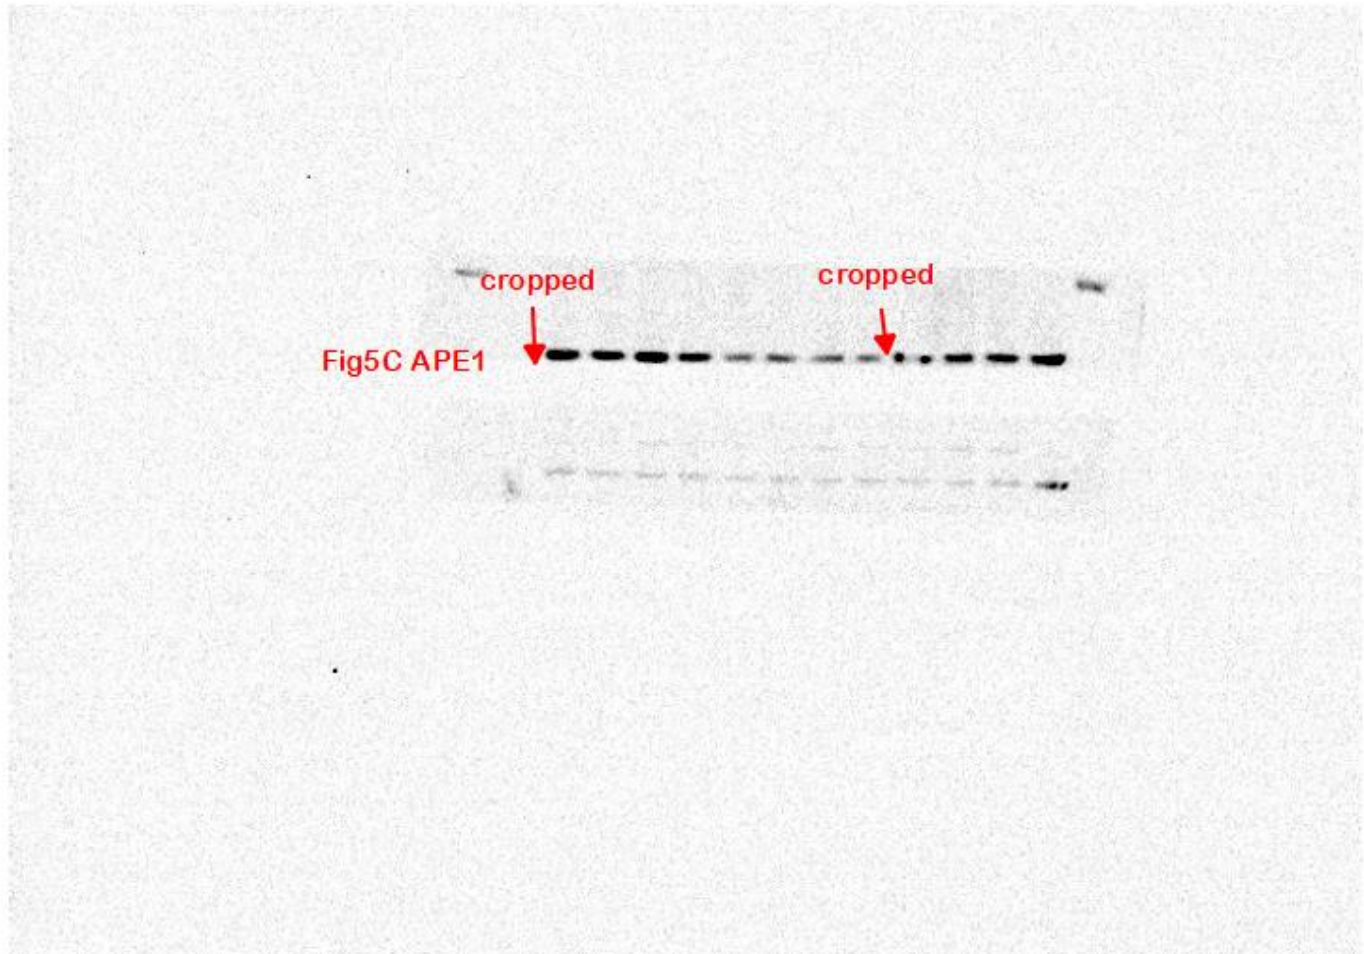

## Supplementary Figure 22

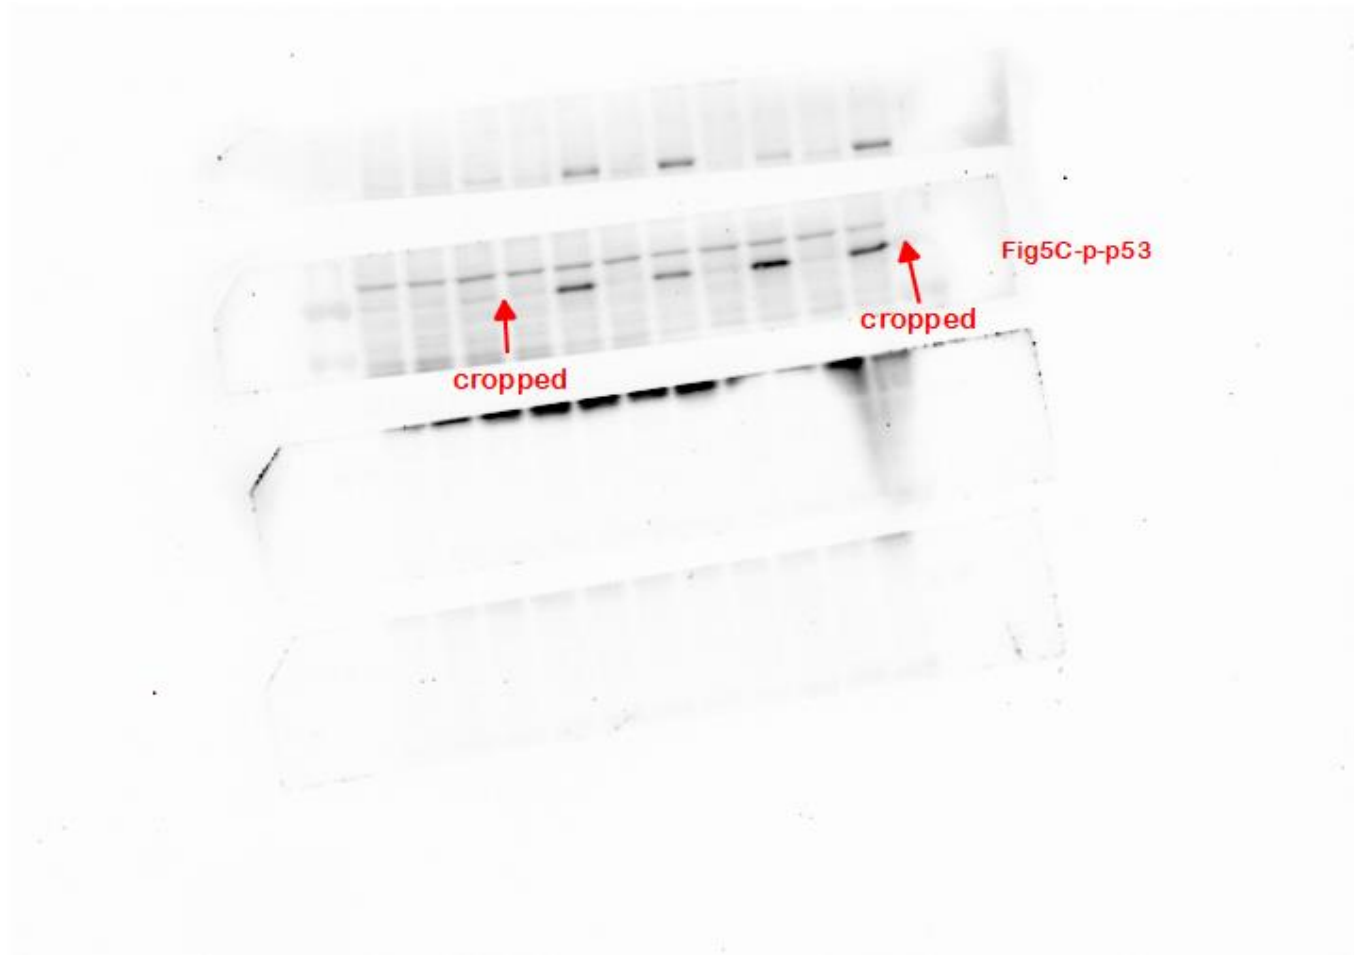

## Supplementary Figure 23

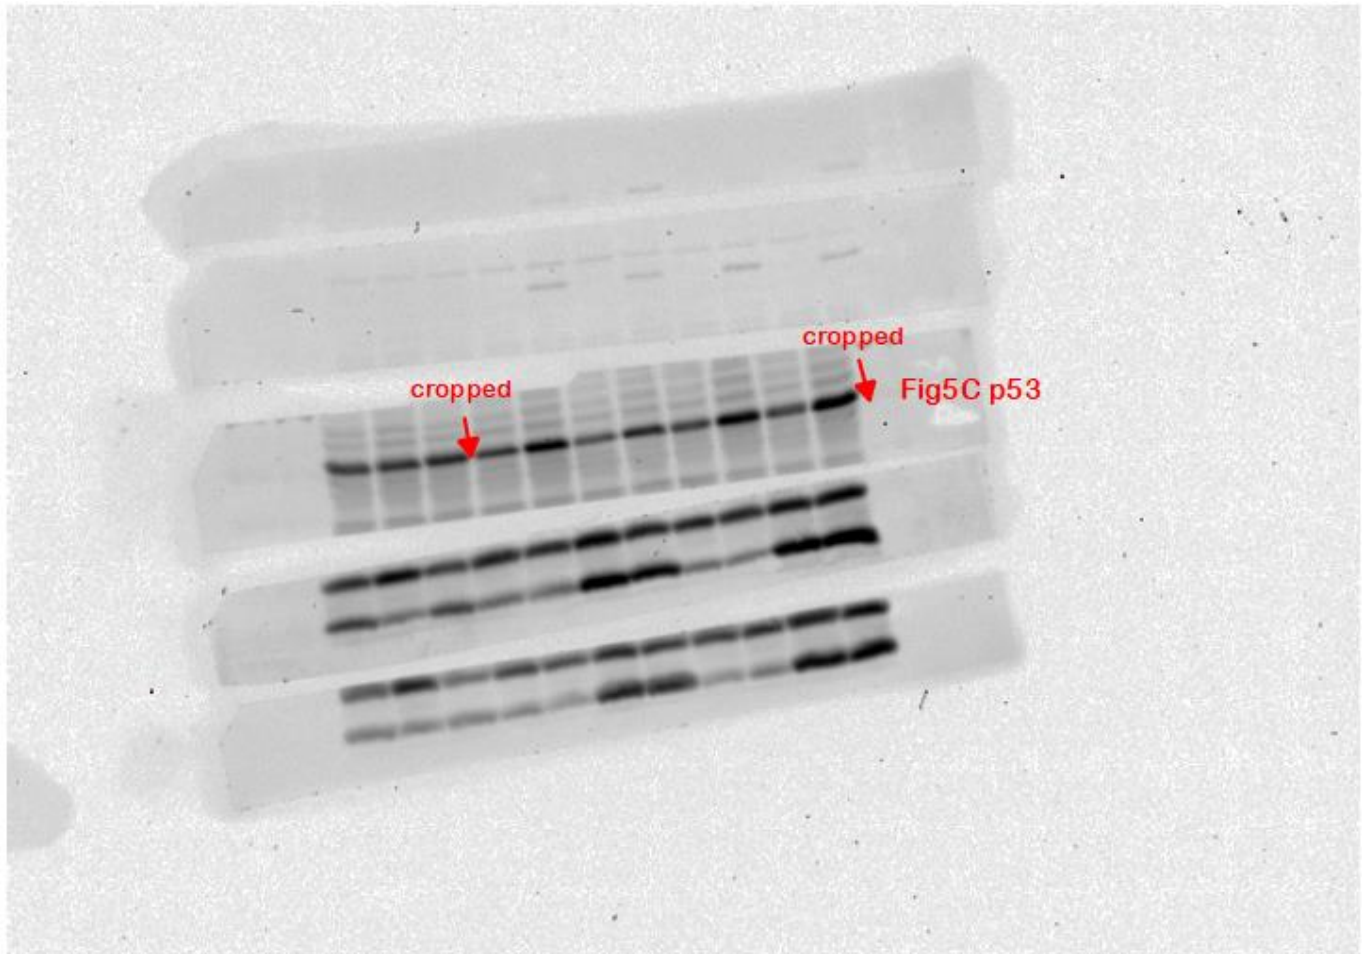

# Supplementary Figure 24

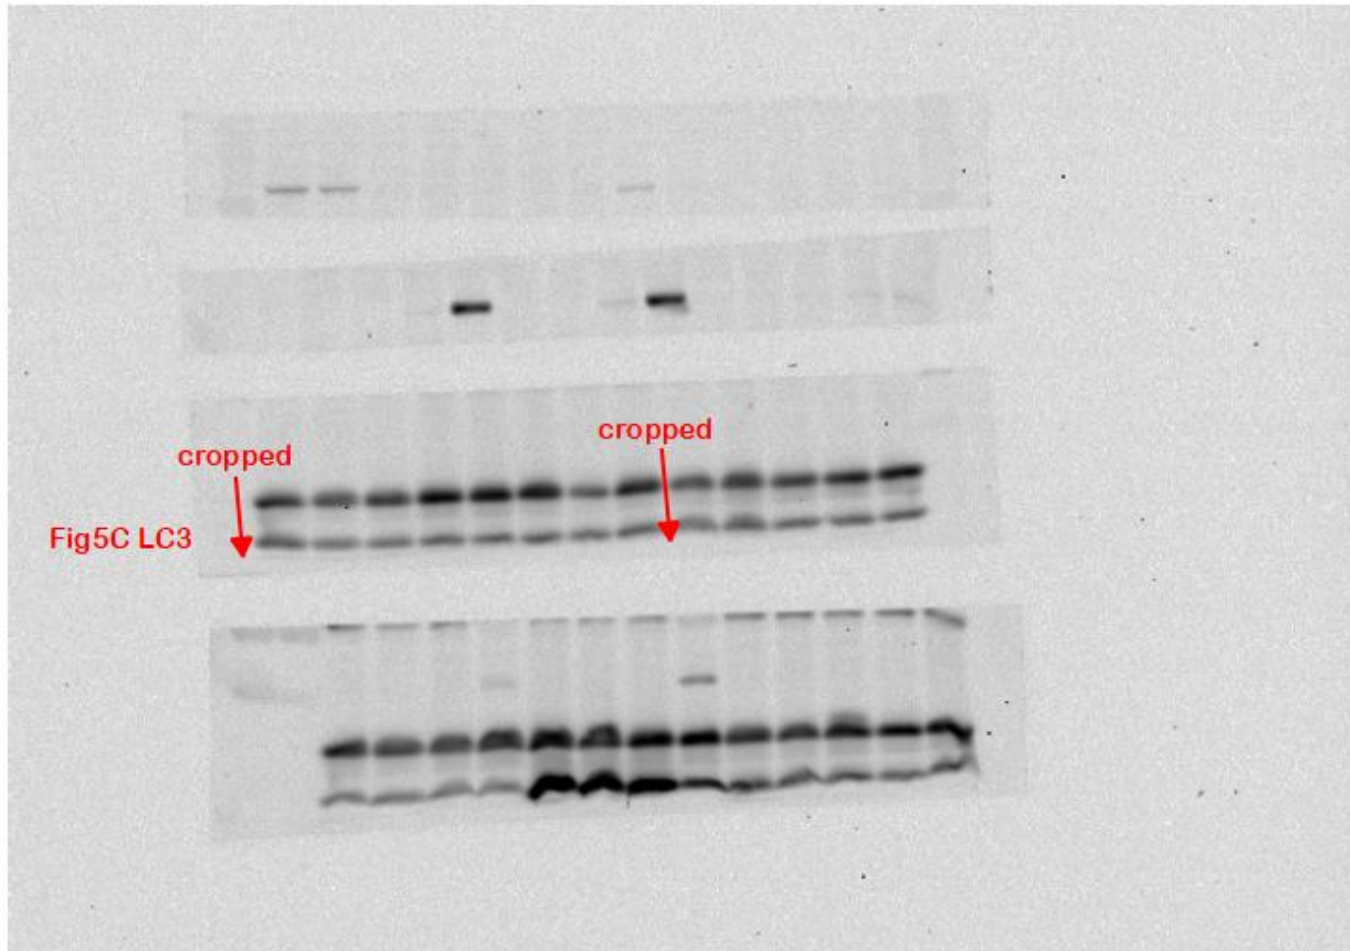



## Supplementary Figure 25

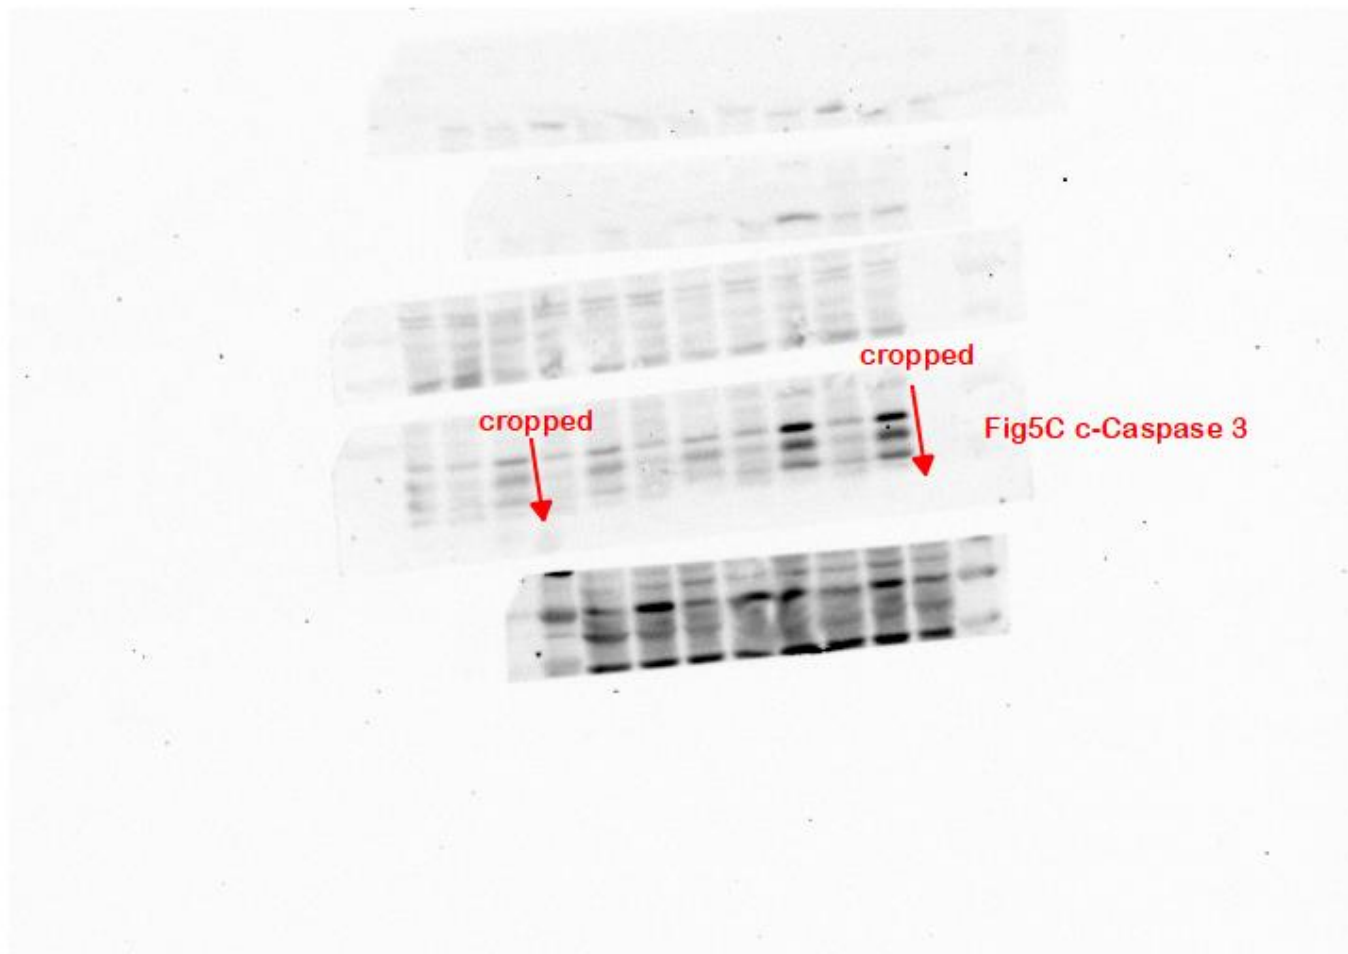

Supplementary Figure 26

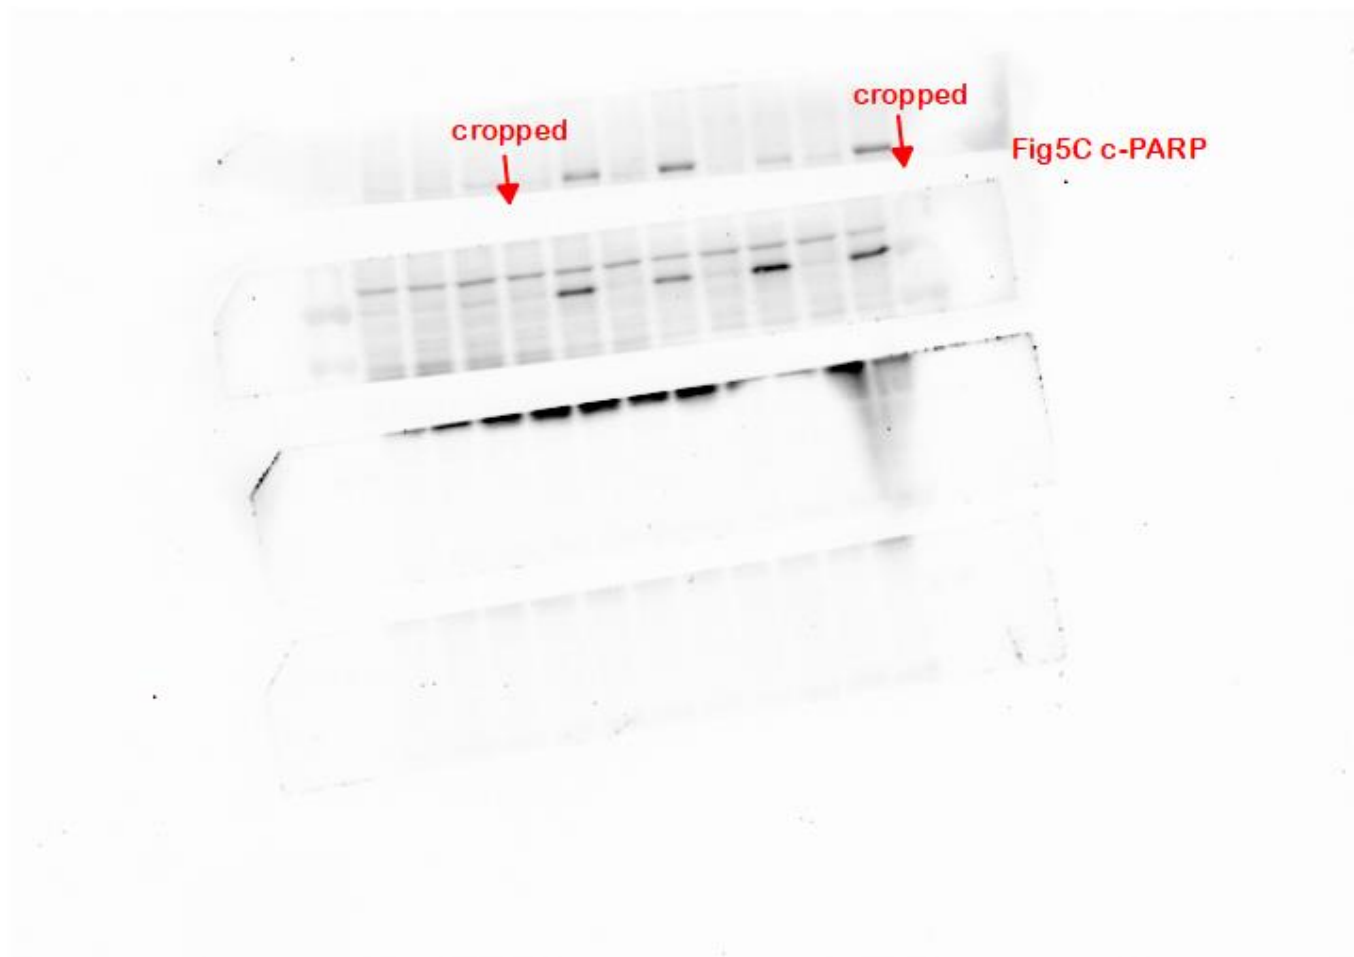

## Supplementary Figure 27

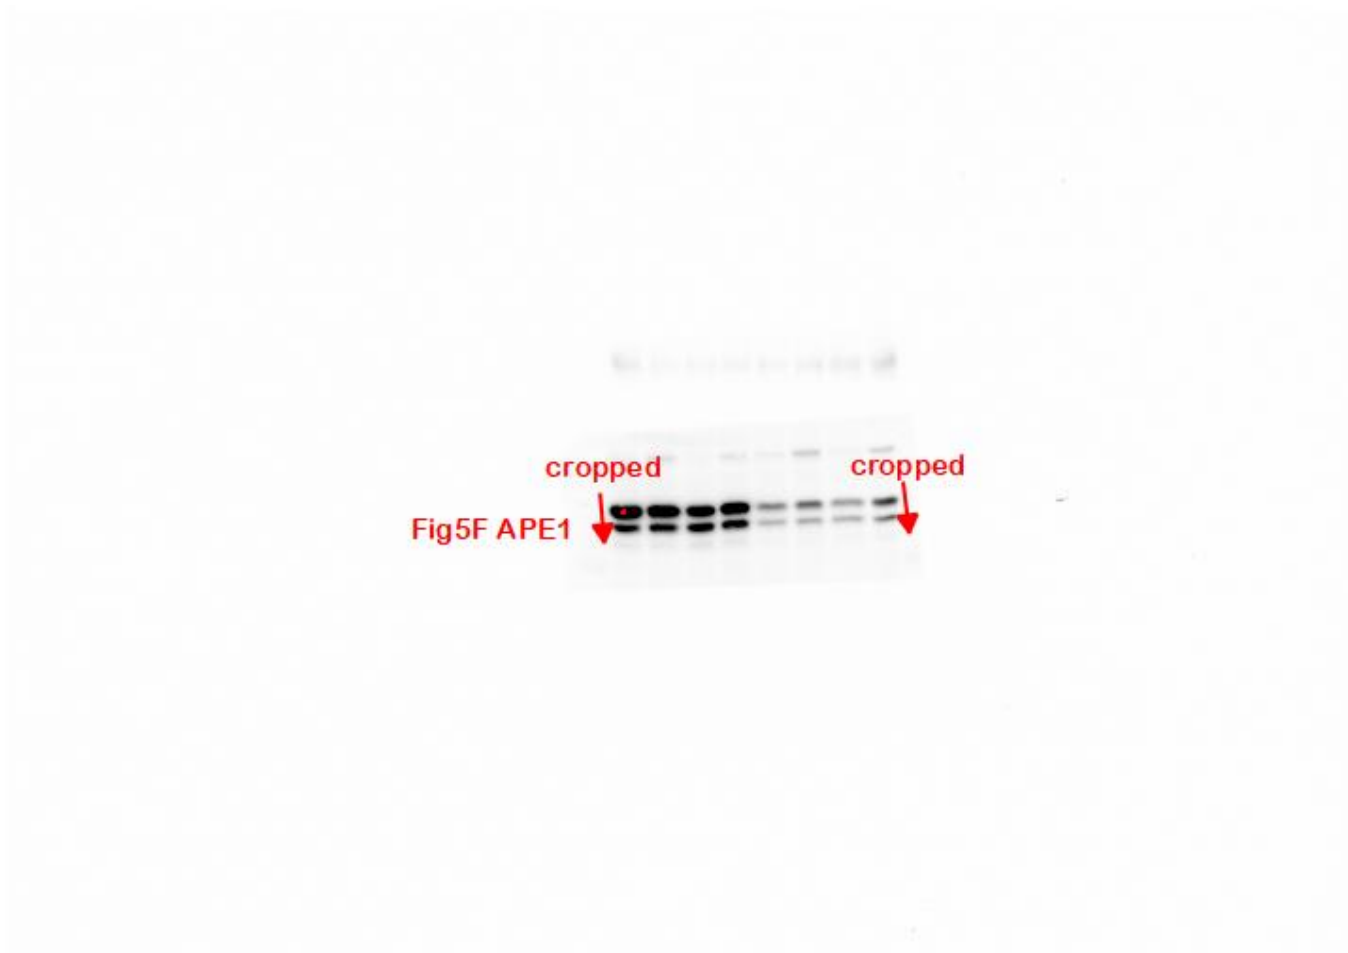

## Supplementary Figure 28

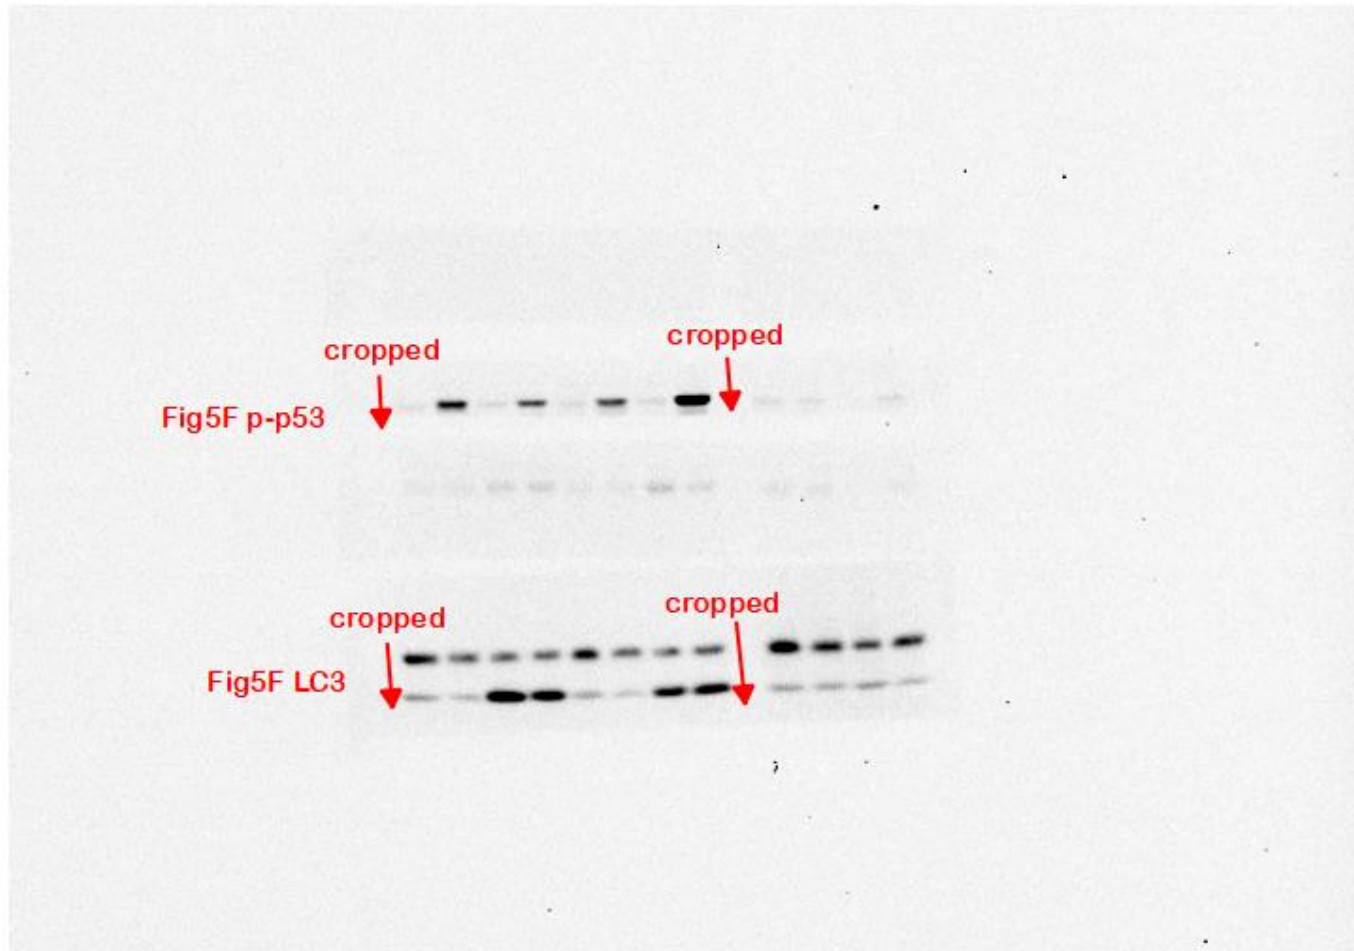

# Supplementary Figure 29

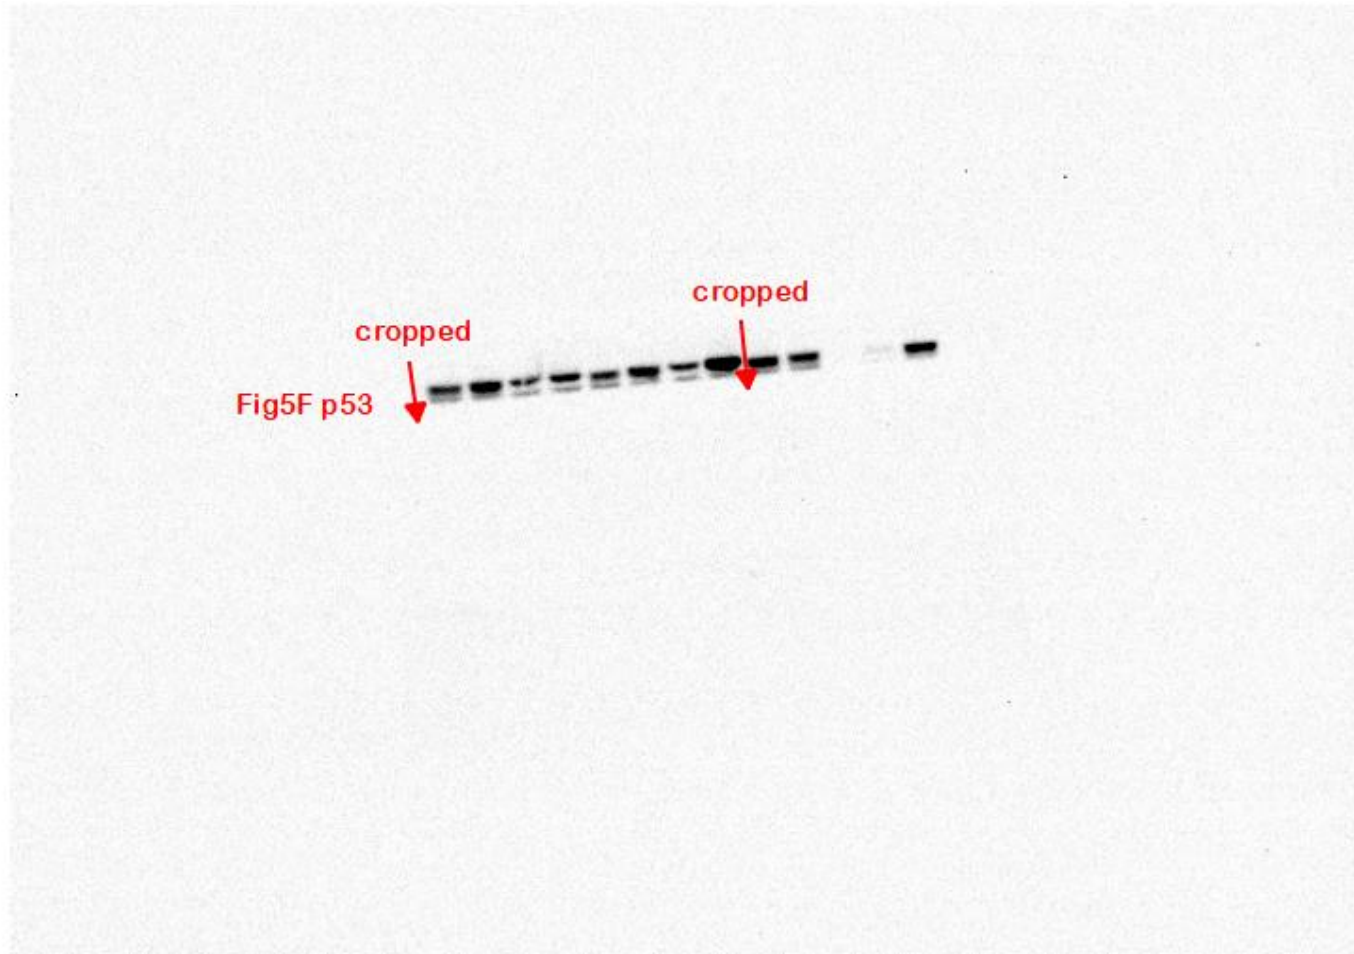

# Supplementary Figure 30

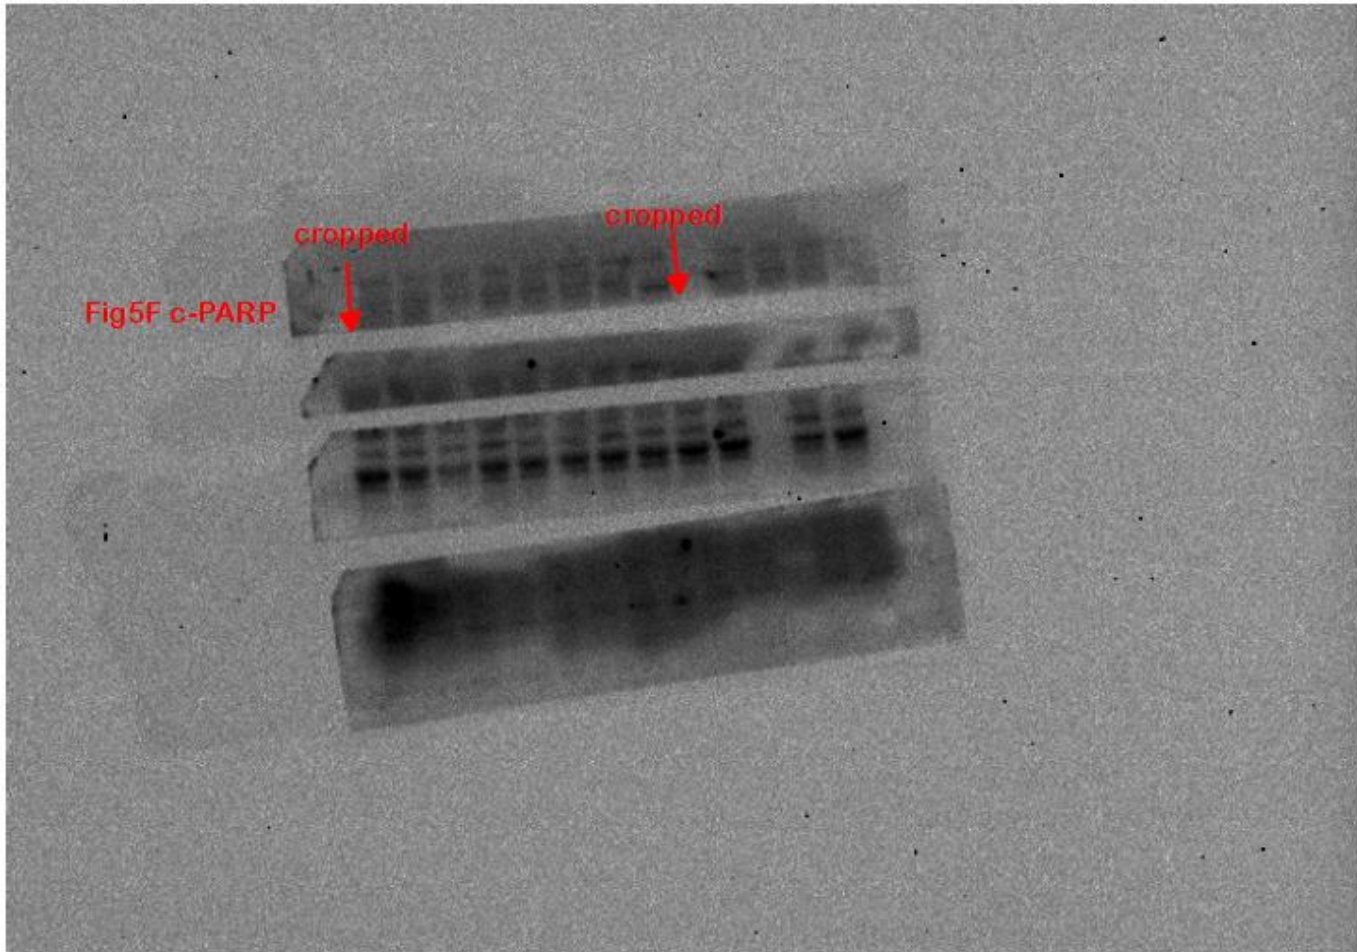

# Supplementary Figure 31

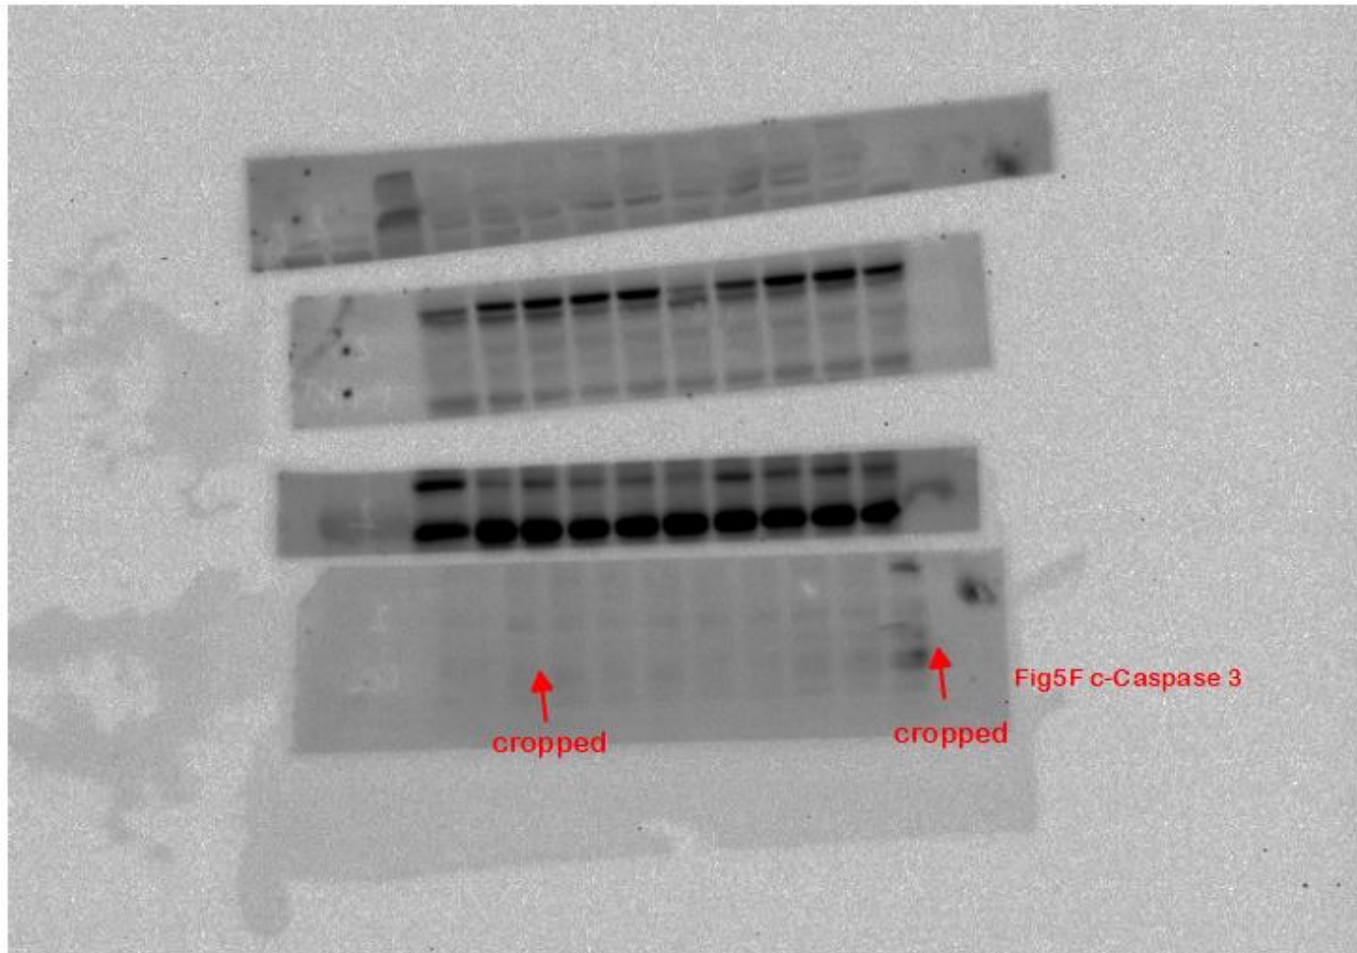

Supplement: MOESM1 [file 18159450]
