# Supplementary material for: Proteomics reveals a therapeutic vulnerability via the combined blockade of APE1 and autophagy in lung cancer A549 cells
Source: Springer Nature journal article supplement (doi:10.1186/s12885-020-07111-w), 2020-07-08

**A**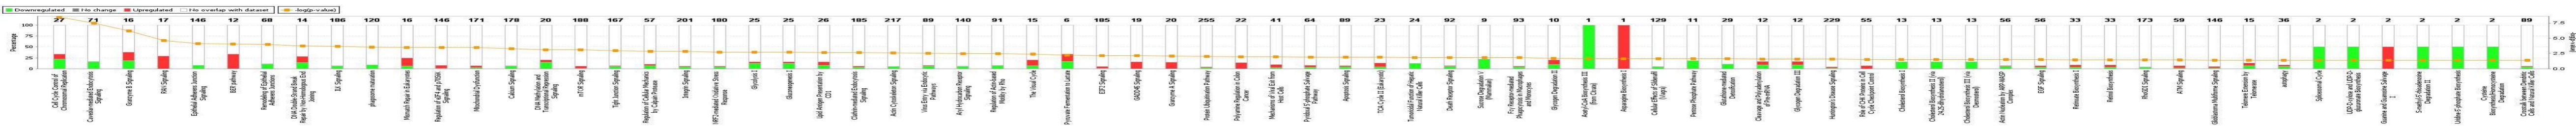**B**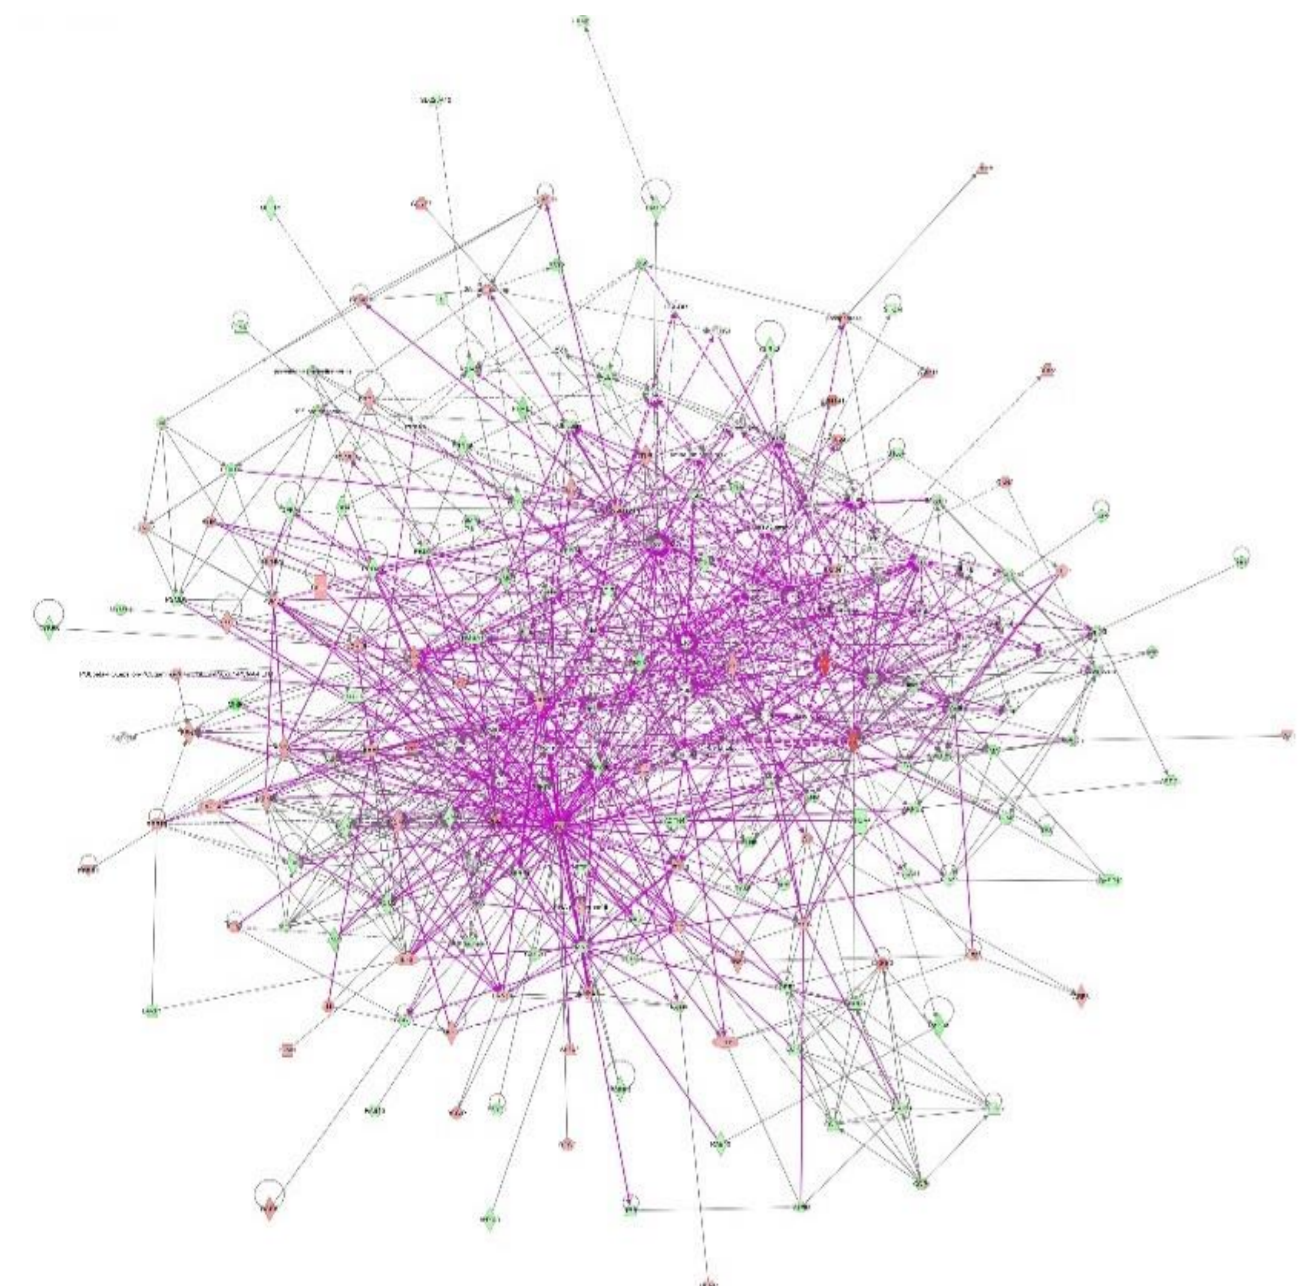**C**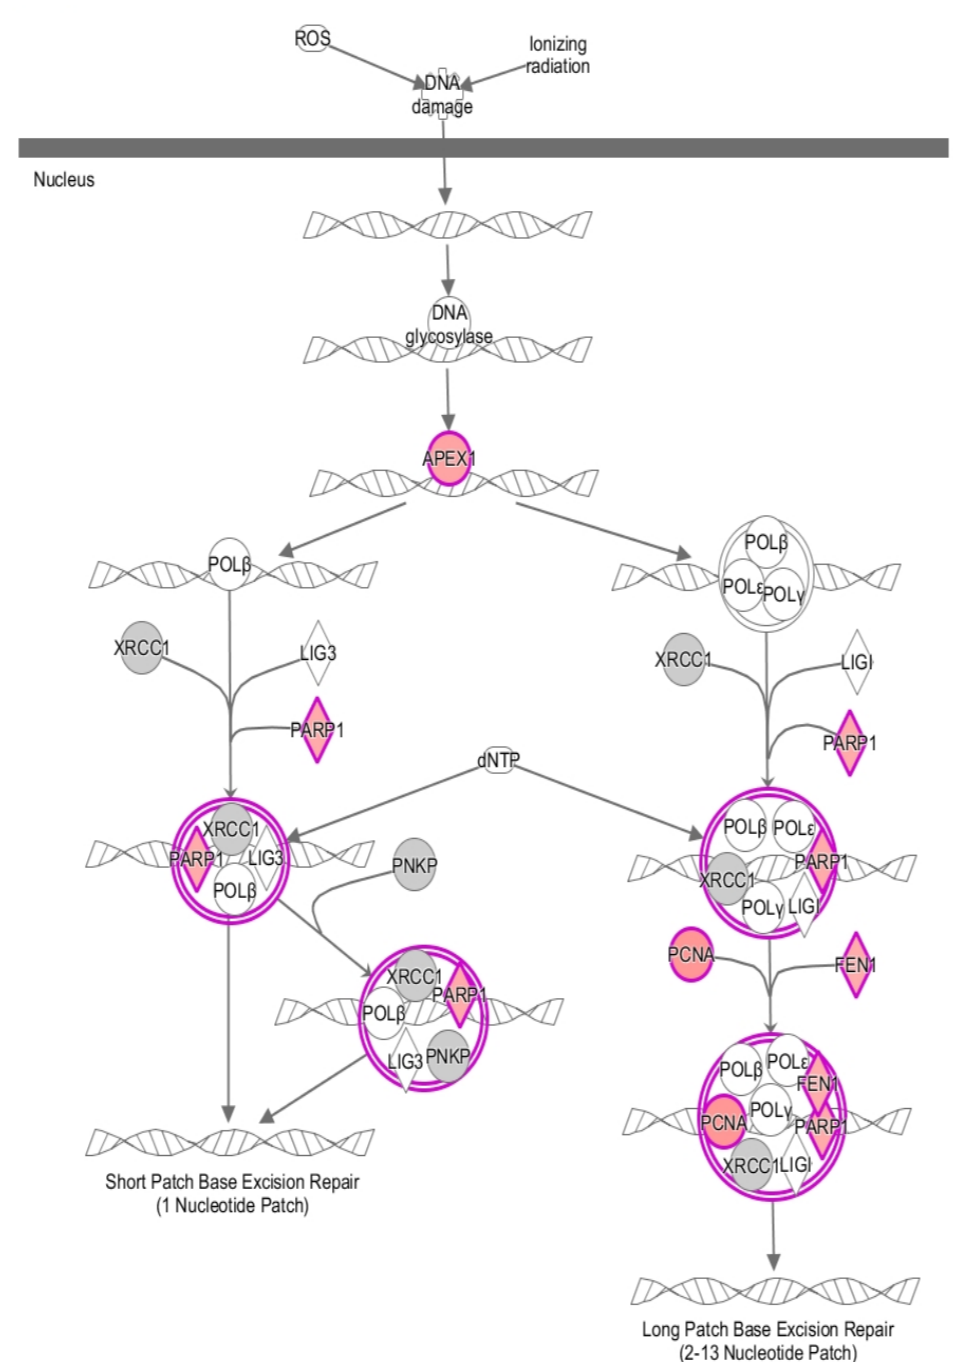**D**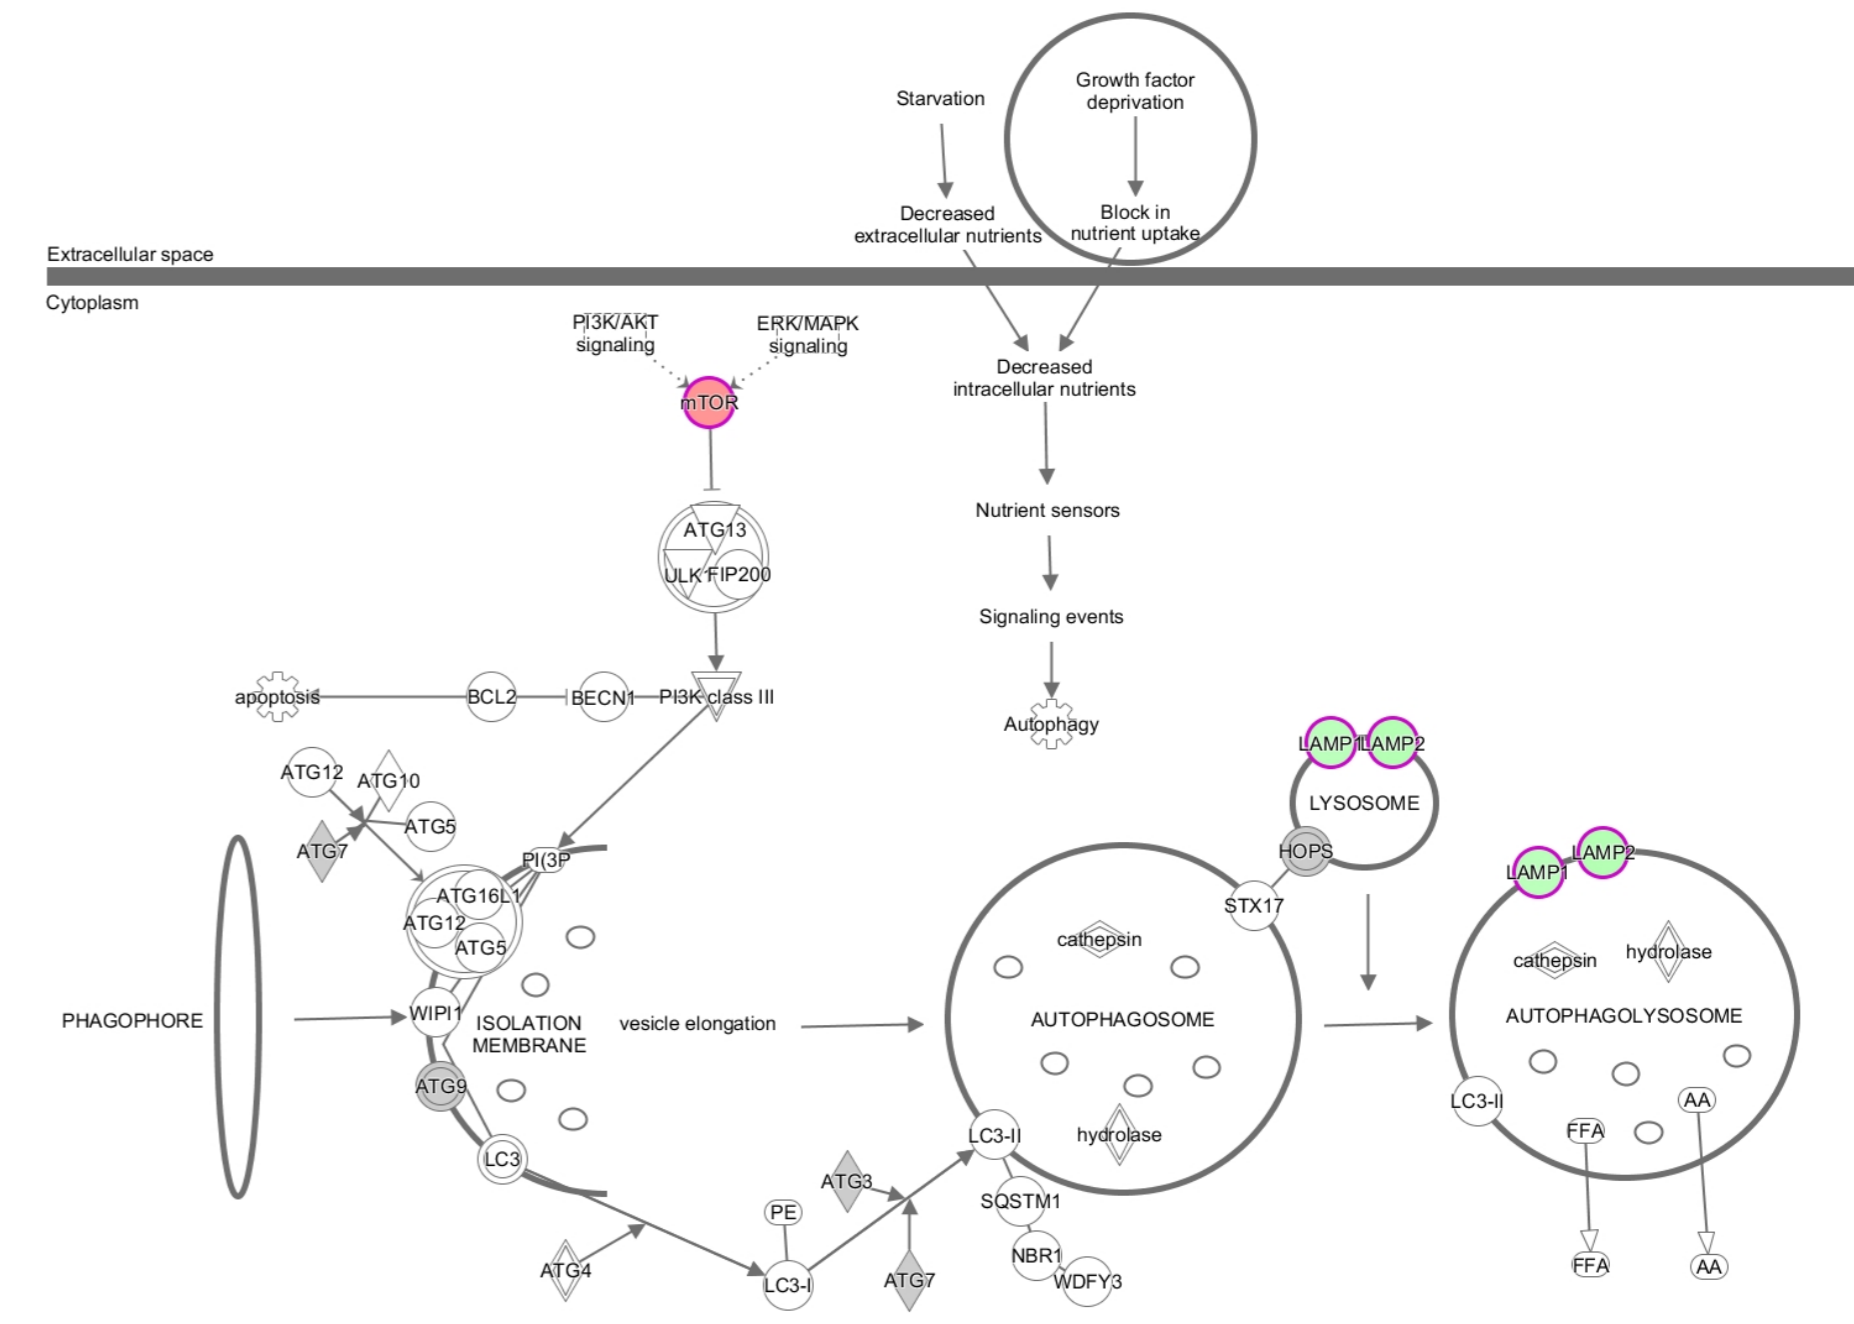

Supplement: MOESM2 [file 18159450]
